1 **Immunological and Antigenic Signatures Associated with Chronic Illnesses after**  
2 **COVID-19 Vaccination**

3 Bornali Bhattacharjee<sup>1,2#</sup>, Peiwen Lu<sup>1#</sup>, Valter Silva Monteiro<sup>1#</sup>, Alexandra  
4 Tabachnikova<sup>1#</sup>, Kexin Wang<sup>2,11#</sup>, William B. Hooper<sup>1,2#</sup>, Victoria Bastos<sup>1#</sup>, Kerrie  
5 Greene<sup>1#</sup>, Mitsuaki Sawano<sup>3</sup>, Christian Guirgis<sup>1,4</sup>, Tiffany J. Tzeng<sup>1,2</sup>, Frederick  
6 Warner<sup>3,5</sup>, Pavlina Baevova<sup>1,2</sup>, Kathy Kamath<sup>6</sup>, Jack Reifert<sup>6</sup>, Danice Hertz<sup>7</sup>, Brianne  
7 Dressen<sup>8</sup>, Laura Tabacof<sup>9</sup>, Jamie Wood<sup>9</sup>, Lily Cooke<sup>9</sup>, Mackenzie Doerstling<sup>9</sup>, Shadan  
8 Nolasco<sup>9</sup>, Amer Ahmed<sup>9</sup>, Amy Proal<sup>9,10</sup>, David Putrino<sup>9</sup>, Laying Guan<sup>2,11\*</sup>, Harlan M.  
9 Krumholz<sup>2,3,12\*</sup>, Akiko Iwasaki<sup>1,2,13\*</sup>

10 **Affiliations:**

- 11 1. Department of Immunobiology, Yale University School of Medicine, New Haven, CT,  
12 USA
- 13 2. Center for Infection and Immunity, Yale School of Medicine, New Haven, CT, USA
- 14 3. Section of Cardiovascular Medicine, Department of Internal Medicine, Yale School of  
15 Medicine, Yale New Haven Hospital Center for Outcomes Research and Evaluation,  
16 Yale New Haven Hospital, CT, USA
- 17 4. Department of Molecular, Cellular, and Developmental Biology, Yale College, New  
18 Haven, CT, USA.
- 19 5. Department of Internal Medicine, Yale School of Medicine, New Haven, CT, USA
- 20 6. SerImmune, Goleta, CA USA
- 21 7. Independent Researcher, CA, USA
- 22 8. Independent Researcher, UT, USA
- 23 9. Cohen Center for Recovery from Complex Chronic Illness, Department of  
24 Rehabilitation and Human Performance, Icahn School of Medicine at Mount Sinai, New  
25 York City, NY, USA
- 26 10. Polybio Research Foundation, Boston, MA, USA
- 27 11. Department of Biostatistics, Yale School of Public Health, New Haven, CT, USA
- 28 12. Section of Cardiovascular Medicine, Department of Internal Medicine, Yale School  
29 of Medicine, New Haven, CT, USA
- 30 13. Howard Hughes Medical Institute, Chevy Chase, MD, USA

31

32 #: Indicates equal contribution

33 \*: Co-senior and corresponding authors

34 Correspondence can be addressed to:

35 [leying.guan@yale.edu](mailto:leying.guan@yale.edu), [harlan.krumholz@yale.edu](mailto:harlan.krumholz@yale.edu), [akiko.iwasaki@yale.edu](mailto:akiko.iwasaki@yale.edu)

36

37 **Keywords**

38 Post-vaccination syndrome, machine learning, immune cell populations, circulating

39 Spike, Epstein-Barr Virus, autoantibodies, antigen persistence

40

41 **SUMMARY**

42 COVID-19 vaccines have prevented millions of COVID-19 deaths. Yet, a small fraction  
43 of the population reports a chronic debilitating condition after COVID-19 vaccination,  
44 often referred to as post- vaccination syndrome (PVS). To explore potential  
45 pathobiological features associated with PVS, we conducted a decentralized, cross-  
46 sectional study involving 42 PVS participants and 22 healthy controls enrolled in the  
47 Yale LISTEN study. Compared with controls, PVS participants exhibited differences in  
48 immune profiles, including reduced circulating memory and effector CD4 T cells (type 1  
49 and type 2) and an increase in TNF $\alpha$ + CD8 T cells. PVS participants also had lower  
50 anti-spike antibody titers, primarily due to fewer vaccine doses. Serological evidence of  
51 recent Epstein-Barr virus (EBV) reactivation was observed more frequently in PVS  
52 participants. Further, individuals with PVS exhibited elevated levels of circulating spike  
53 protein compared to healthy controls. These findings reveal potential immune  
54 differences in individuals with PVS that merit further investigation to better understand  
55 this condition and inform future research into diagnostic and therapeutic approaches.

56

57

## 58 INTRODUCTION

59 The rapid development and deployment of COVID-19 vaccines have been pivotal in  
60 mitigating the impact of the pandemic<sup>1</sup>. These vaccines have significantly reduced  
61 severe illness and mortality associated with SARS-CoV-2 infection<sup>2</sup>. Additionally,  
62 vaccinated individuals experience a lower incidence of post-acute sequelae of COVID-  
63 19 (PASC) or long COVID, thus highlighting an additional potential benefit of receiving  
64 the COVID-19 vaccines<sup>3,4</sup>. However, COVID-19 vaccines are associated with rare  
65 acute adverse events<sup>5</sup> such as myocarditis and pericarditis<sup>6</sup>, thrombosis and  
66 thrombocytopenia<sup>7</sup>, Guillain–Barre syndrome, transverse myelitis, and Bell’s Palsy<sup>8,9</sup>.

67 In addition, some individuals have reported post-vaccination symptoms resembling long  
68 COVID beginning shortly after vaccination. This condition, sometimes referred to as  
69 post-vaccination syndrome (PVS) or post-acute COVID-19 vaccination syndrome  
70 (PACVS)<sup>10,11</sup>, is characterized by symptoms such as exercise intolerance, excessive  
71 fatigue, numbness, brain fog, neuropathy, insomnia, palpitations, myalgia, tinnitus or  
72 humming in ears, headache, burning sensations, and dizziness<sup>10</sup>. Unlike long COVID,  
73 PVS is not officially recognized by health authorities, which has significantly limited  
74 patient care and support.

75 The molecular mechanisms of PVS remain largely unknown. However, there is  
76 considerable overlap in self-reported symptoms between long COVID and PVS, as well  
77 as shared exposure to SARS-CoV-2 spike (S) protein in the context of inflammatory  
78 responses during infection or vaccination<sup>10,12,13</sup>. In susceptible individuals, vaccines may  
79 contribute to long-term symptoms by multiple mechanisms. For example, vaccine  
80 components, such as mRNA, lipid nanoparticles, and adenoviral vectors, trigger  
81 activation of pattern recognition receptors<sup>14,15</sup>. Thus, unregulated stimulation of innate  
82 immunity could lead to chronic inflammation. Secondly, it has been shown that the S  
83 protein expressed following BNT162b2 or mRNA-1273 vaccination circulates in the  
84 plasma as early as one day after vaccination<sup>16,17</sup>. Interaction with full-length S, its  
85 subunits (S1, S2), and/or peptide fragments with host molecules may result in  
86 prolonged symptoms in certain individuals<sup>16</sup>. Recently, a subset of non-classical  
87 monocytes has been shown to harbor S protein in patients with PVS<sup>18</sup>. Further,  
88 biodistribution studies on mRNA–LNP platforms in animal models indicate its ability to  
89 cross the blood-brain barrier, and the local S expression could result in neurocognitive  
90 symptoms<sup>19,20</sup>. Third, vaccine-induced immune responses may be triggering the  
91 stimulation of autoreactive lymphocytes<sup>21</sup>.

92 To investigate immunological features in people suffering from persistent symptoms  
93 after COVID-19 vaccination, a cross-sectional case-control study was undertaken to  
94 identify the immunological correlates of PVS. A total of 42 participants with PVS who  
95 had no pre-existing comorbidities and 22 contemporaneous healthy controls who did not  
96 report PVS after receiving COVID-19 vaccines were included. An important factor to  
97 evaluate was the possibility that PVS might result from an undiagnosed, asymptomatic  
98 SARS-CoV-2 infection coinciding with the vaccination period, instead of being directly  
99 caused by the vaccine administration. In addition, infection with SARS-CoV-2  
100 significantly impacts immune signatures<sup>22</sup>. Our objectives were twofold: (1) to conduct a

101 two-group case-control analysis of the immunophenotypic profiles of individuals with  
102 PVS in comparison with asymptomatic vaccine recipients, and (2) to compare the  
103 immunophenotypic profiles of those with PVS with or without a history of SARS-CoV-2  
104 infection. To achieve these, we profiled circulating immune cell populations, antibody  
105 responses, and circulating immune modulator levels in addition to assessing the  
106 demographic and general health characteristics of the participants.

## 107 **RESULTS**

### 108 **Cohort Description**

109 All the blood samples were collected between December 2022 and November 2023  
110 from the Listen to Immune, Symptom and Treatment Experiences Now (LISTEN) study  
111 <sup>23</sup>. The PVS cohort consisted of a total of 42 participants, including 29 females and 13  
112 males with no preexisting comorbidities, whereas the control cohort consisted of 22  
113 participants, including 13 females and 9 males (Figures S1A and 1A). Upon recruitment  
114 of 44 PVS participants, two had to be excluded from the analyses due to evidence of  
115 pharmacological immunosuppression. Information on index vaccine types was reported  
116 by 39 out of 42 PVS participants included in the analyses, and they were Comirnaty  
117 (Pfizer) (n=14), Spikevax (Moderna) (n=21), and Jcovden (J&J) (n=4). The most  
118 frequent symptoms reported by participants were excessive fatigue (85%), tingling and  
119 numbness (80%), exercise intolerance (80%), brain fog (77.5%), difficulty concentrating  
120 or focusing (72.5%), trouble falling or staying asleep (70%), neuropathy (70%), muscle  
121 aches (70%), anxiety (65%), tinnitus (60%) and burning sensations (57.5%). Further,  
122 pairwise Euclidean distances were calculated in a sex-segregated manner based on the  
123 presence of symptoms at recruitment and two distinct clusters of symptoms were  
124 identified in both (Table S1, Figure S1B).

125 Between the case and control cohorts, a total of 15 (35.7%) and 10 (45.5%) reported  
126 having a history of one or more previous SARS-CoV-2 infections, respectively (Table  
127 S2). However, upwards of 40% of SARS-CoV-2 infections are asymptomatic<sup>24</sup>. To  
128 further investigate prior history of SARS-CoV-2 infections, plasma specimens were  
129 analyzed using the EUA-cleared Elecsys® anti-SARS-CoV-2 immunoassays, which  
130 measure the presence of high affinity IgM, IgA, and IgG anti-N antibodies. A cut-off  
131 index  $\geq 1$  was defined as reactive based on previous literature<sup>25</sup>. In the non-reactive  
132 group, the antibody indices varied between 0.09 and 0.17, whereas in the reactive  
133 group, they ranged between 1.37 and 94.4. Among participants with PVS, 26 (61.9%)  
134 were found to be reactive compared with 10 (45.5%) among controls. One participant  
135 from each cohort with self-reported history of infection had non-reactive test results.  
136 Based on both self-reports and serological analyses the two cohorts were further  
137 classified into four subgroups, PVS with no history of infection (PVS-I, n= 15), PVS with  
138 a history of infection (PVS+I, n= 27), controls with no history of infection (Control-I, n=  
139 11) and controls with a history of infection (Control+I, n= 11) (Figure 1A, Table S2).  
140 Even though all PVS participants developed chronic symptoms following vaccination  
141 and not infection, it was important to consider the impact of a subsequent SARS-CoV-2  
142 infection on immune phenotypes analyzed in this study.

143 Among the demographic variables, there were no significant differences in the number  
144 of males and females between cases and controls (Fisher's Exact test,  $p = 0.58$ ) or  
145 among the four groups (Kruskal-Wallis test,  $p = 0.25$ ; Figure 1B). Similarly, no significant  
146 age differences were observed between cases and controls, median age (42.5 years,  
147 PVS; 38 years, controls, Mann-Whitney U test  $p = 0.27$ ) and among the four groups  
148 ( $p = 0.17$ ; Figure 1C).

149 The self-reported General Health Visual Analogue Scale (GHVAS) scores on the day of  
150 biospecimen collection differed significantly among the four groups (Kruskal-Wallis test,  
151  $p < 0.01$ ). The controls in both subgroups had significantly higher median scores  
152 compared with the PVS subgroups (64, PVS-I; 60, PVS+I; 95, Control-I; 90, Control+I;  
153 Figure 1D). The PROMIS-29 physical function, fatigue, pain interference, depression,  
154 anxiety, sleep disturbance, and pain interference scores were compared independently  
155 among the four groups to gauge the physical and mental health status of the  
156 participants. The physical function scores were significantly higher among the controls  
157 than the cases irrespective of infection status, median scores (13, PVS-I; 14.5, PVS+I;  
158 20, Control-I; 20, Control+I). The anxiety (9.5, PVS-I; 10, PVS+I; 5, Control-I; 4,  
159 Control+I), depression (8.5, PVS-I; 8, PVS+I; 4, Control-I; 4, Control+I), fatigue (16,  
160 PVS-I; 15, PVS+I; 6, Control-I; 7, Control+I) and pain scores (9.5, PVS-I; 12, PVS+I; 4,  
161 Control-I; 4, Control+I) were significantly lower in controls compared with participants  
162 with PVS irrespective of infection status. Further, significantly higher sleep disturbance  
163 scores were observed only among infection-negative cases compared to control-I  
164 participants (13, PVS-I; 10, Control-I) (Figure 1E).

165 Most individuals in each cohort completed the primary series of vaccines based on  
166 WHO recommendations (83.3%, PVS; 100%, Controls; Fisher Exact test,  $p = 0.09$ ).  
167 Participants with PVS received significantly fewer COVID-19 vaccine doses compared  
168 with controls, median vaccine numbers (2, PVS; 4, controls; Fisher Exact test,  
169  $p < 0.01$ ). On similar lines, the median number of days post the latest vaccination was  
170 significantly higher among cases with a median of 585 days ( $\pm 190$ ) compared with 199  
171 days ( $\pm 217$ ) among controls (Mann-Whitney U test,  $p < 0.01$ ). In 85% of the cases,  
172 participants identified the index vaccine dose as being part of the primary series [dose  
173 1(45%) and dose 2(40%); Figure 1F]. The median number of days for the development  
174 of any symptom was 4 [Interquartile range (IQR): 23 days], while for severe symptoms,  
175 it was 10 (IQR: 44 days) post-vaccination. A high proportion of participants with PVS  
176 developed any symptoms (70%) or severe symptoms (52.2%) within 10 days of  
177 vaccination (Figure 1G).

## 178 Differences in circulating immune cell populations

179 To determine immune signatures of PVS, peripheral blood mononuclear cells (PBMC)  
180 were analyzed using flow cytometry. Among the cell populations of myeloid lineage,  
181 proportions of non-classical monocytes ( $CD14^{low}CD16^{high}$ ; Mann-Whitney U test,  $p =$   
182  $0.03$ ) were significantly higher in the PVS cohort compared to the controls without  
183 significant differences in the percentage of total monocytes despite greater median  
184 values in PVS (Figure 2A). The median percentage of conventional type 2 dendritic cells  
185 (cDC2;  $CD304^+HLA-DR^+/CD1c^+$ ) was significantly lower among the participants with



186 PVS compared to the controls ( $p= 0.02$ ) while no differences were observed in the  
187 proportions of conventional type 1 dendritic cells (cDC1;  $(CD304^-/HLA-DR^+/CD141^+)$   
188 (Figure 2B). Pairwise comparisons were also executed to understand the differences  
189 among the PVS subgroups with or without a history of infection. Among the low-density  
190 granulocytes, no differences were observed between cases and controls in the  
191 proportions of eosinophils ( $CD66b^+CD56^-CD16^-$ ) or between the cases and controls in  
192 the infected or uninfected subgroups but the proportion of neutrophils ( $CD66b^+/CD56^-$   
193  $/CD16^+$ ) was significantly higher ( $p= 0.02$ ) in infection positive PVS subgroup (PVS+I)  
194 compared to the convalescent controls (control+I) (Figure S2A). Significantly lower and  
195 higher proportions of classical and non-classical monocytes, respectively, were  
196 observed among the PVS+I compared to the control+I subgroup ( $p(\text{cMonocytes})=$   
197  $<0.01$ ;  $p(\text{ncMonocytes})= 0.03$ ) with no differences between the cases and controls  
198 without prior history of SARS-CoV-2 infection (Figure S2B). Next, significantly higher  
199 proportions of both cDC1 and cDC2 cells were observed in the control+I subgroup  
200 compared to the PVS+I subgroup ( $p= 0.03$  and  $p= <0.01$ ), respectively (Figure S2C).

201 Among the B cell populations, relative proportions of unswitched memory B cells (US  
202 memory B cells;  $CD19^+/CD27^+/IgD^+$ ) were significantly higher ( $p= 0.02$ ) while the  
203 proportion of double negative B cells (DN B;  $IgD^-/CD27^-/CD24^-/CD38^-$ ) was observed to  
204 be lower ( $p= 0.01$ ) in the PVS cohort compared with controls (Figure 2C).

205 Significant differences in subsets of circulating immune cell populations were observed  
206 across T cell lineages. Upon assessment of the T cell populations, notably higher  
207 proportions of effector memory CD4 T cell subsets ( $CD4^+Tem$ ;  $CD45RA^-/CD127^+/CCR7^-$   
208 ;  $p= 0.01$ ) and resting natural CD4<sup>+</sup> Treg;  $CD45RA^+/CD25^+/CD127^-/HLA-DR^-$ ;  $p= 0.05$ )  
209 were observed among the controls (Figure 2D). However, the PVS cohort had  
210 significantly higher proportions of exhausted CD8 T cell ( $CD8^+Tex$ ;  $PD-1^+/TIM3^+$ ;  $p=$   
211  $0.02$ ) (Figure 2F) with no observed differences in the CD4<sup>+</sup> central memory ( $CD4^+cm$ ;  
212  $CD45RA^-/CD127^+/CCR7^-$ ) and exhausted ( $CD4^+Tex$ ;  $PD-1^+/TIM3^+$ ) CD4 T cell  
213 populations (Figure 2D). Upon *in-vitro* stimulation, the expression of CXCR3 on the cell  
214 surface (Mann-Whitney U test,  $p= <0.01$ ), intracellular IL-4 levels ( $p= 0.04$ ) and IL-4, IL-  
215 6 in combination were found to be significantly lower in the CD4 T of PVS cohort ( $p=$   
216  $<0.01$ ), with no differences were observed in  $IFN\gamma$  &  $TNF\alpha$  levels (Figure 2E).  
217 Significant increases in intracellular  $TNF\alpha$  levels ( $p= <0.01$ ) with non-significant  
218 increases in  $IFN\gamma$  in the stimulated CD8 T cells were observed in PVS cohort (Figure  
219 2F). Only a total of 32.23% of the variability in intracellular  $TNF\alpha$  could be explained by  
220  $IFN\gamma$  levels in the CD8<sup>+</sup> T cell populations ( $R^2= 0.32$ ; Figure 2G).

221 In the subgroup analyses, no differences in proportions of DN B cell subpopulations  
222 were observed (Figure S2D). Proportions of CD4<sup>+</sup> CD45RA<sup>+</sup> effector memory T cells  
223 ( $CD4^+T_{EMRA}$ ;  $CD45RA^+/CD127^-/CCR7^-$ ;  $p= 0.02$ ) and rTregs ( $p= 0.03$ ) were both  
224 observed to be significantly lower in PVS+I compared to the control+I subgroup (Figure  
225 S2E). Proportions of CXCR3 expressing stimulated CD4 T cells was much lower in  
226 PVS+I cases ( $p= <0.01$ ) and the proportions of both IL-4<sup>+</sup> ( $p= 0.04$ ), and IL-4<sup>+</sup>/IL-6<sup>+</sup> ( $p=<$   
227  $0.01$ ) double-positive cells were also lower compared to the controls (Figure S2E).  
228 Higher proportion of CD8<sup>+</sup> Tcm cells was retained in the PVS+I subgroup compared to

229 the control+I group (Figure S2F;  $p= 0.02$ ). No differences were observed in immune cell  
230 populations between the infection-negative cases (PVS-I) and controls (Controls-I).

### 231 **Lower levels of spike-specific antibody responses in PVS**

232 Given the differences in the number of vaccine doses received between participants in  
233 the PVS cohort and the control group, we compared spike-specific immunoglobulin G  
234 (IgG) levels in relation to the number of vaccine doses administered. Correlation  
235 analyses revealed a significant positive correlation between the number of vaccine  
236 doses and plasma anti-S IgG levels (Spearman's Rank Correlation Coefficient,  $\rho = 0.85$ ,  
237  $p= <0.01$ ) as well as anti-RBD IgG levels ( $\rho = 0.83$ ,  $p= <0.01$ ) in the PVS-I subgroup. In  
238 the PVS+I subgroup, only anti-S IgG levels showed a significant correlation ( $\rho = 0.55$ ,  $p$   
239  $= 0.01$ ) with the number of doses (Figure 3A). Next, correlation analyses were  
240 performed to assess the relationships between plasma anti-S, anti-RBD, and anti-N IgG  
241 levels with the number of days post last vaccination among the four groups. No  
242 significant changes in anti-S and anti-RBD antibody levels were observed with  
243 increasing days since vaccination in the control group, regardless of infection history,  
244 and in the PVS+I subgroup (Fig 3B). In contrast, significant negative correlations were  
245 found in the PVS-I subgroup between the number of days post-vaccination and both  
246 anti-S ( $\rho = -0.87$ ,  $p= <0.01$ ) and anti-RBD ( $\rho = -0.83$ ,  $p= <0.01$ ) IgG levels, indicating a  
247 decline in these antibodies over time (Fig. 3B). Additionally, as expected, no  
248 correlations were observed between anti-N IgG levels and days post vaccination across  
249 the infection-positive subgroups.

250 The next step was to evaluate if the most recent exposure to SARS-CoV-2 or  
251 vaccination correlated with the observed differences in waning patterns. No significant  
252 changes in anti-S, anti-RBD and anti-N antibody levels were observed with an increase  
253 in the number of days from self-reported viral infection dates among the Control+I and  
254 PVS+I subgroups (Figure 3C). In addition, the plasma titers of anti-S IgG were  
255 significantly lower among the PVS-I cases compared to the Control-I subgroup ( $p=$   
256  $<0.01$ ) (Figure 3D). However, no differences were observed in the anti-RBD IgG levels  
257 across the four subgroups (Figure 3D). As expected, the uninfected PVS-I and the  
258 Control-I subgroups had much lower anti-N IgG levels as detected by in-house ELISAs  
259 (Figure 3D). To further account for variations in vaccine doses and infection, we  
260 developed linear models. Those models indicated that both prior SARS-CoV-2 infection  
261 and the number of vaccine doses were significantly associated with higher levels of anti-  
262 RBD and anti-S IgG (Figure 3E, Table S3).

### 263 **Serological evidence of recent EBV reactivation in PVS**

264 Many human pathogens are ubiquitous, opportunistic, and capable of establishing  
265 lifelong infections with alternate latency and reactivation cycles<sup>26</sup>. These cycles can be  
266 triggered by physiological perturbations and can contribute to systemic inflammation<sup>27</sup>.  
267 Therefore, we used serum epitope repertoire analysis (SERA) to evaluate seropositivity  
268 against a range of pathogens, including five bacterial, seven parasitic, 14 viral and one  
269 fungal species. On performing two group analyses, no significant differences were  
270 observed for all pathogens, indicating similar levels of prior exposure. (Fig. 4A).



271 Moreover, the seropositivity for each pathogen did not significantly differ from  
272 seropositivity in 3448 healthy controls collected before the COVID-19 pandemic (Figure  
273 4A). Given the high seropositivity rates for herpesviruses, we further analyzed the  
274 seropositivity patterns in combination, for cytomegalovirus (CMV), Epstein-Barr Virus  
275 (EBV), Herpes Simplex Virus Type 1 (HSV-1) and Herpes Simplex Virus Type 2 (Figure  
276 4B). Significant differences were observed between cases and controls (Mann-Whitney  
277 U test,  $p = 0.01$ ; Figure 4C), where the participants with PVS had higher prevalence of  
278 EBV and HSV coinfection, and lower prevalence of EBV and CMV coinfection. There  
279 are reports of similarities in symptom phenotypes between PVS and long COVID, as  
280 well as evidence of EBV reactivation in long COVID cases, including elevated  
281 antibodies against EBV surface protein gp42<sup>22, 28</sup>. Therefore, we further investigated the  
282 prevalence of antibodies against EBV gp42 and identified significantly elevated  
283 antibodies in the plasma of PVS participants compared with controls (Kruskal-Wallis  
284 test,  $p = <0.01$ , Figure 4D, E). As an orthogonal validation, we tested the distribution of  
285 linear peptide reactivities across the EBV proteome. Greater reactivities to two peptides  
286 corresponding to two envelope glycoproteins necessary for B cell infection, gp42 and  
287 gp350 were observed. For the gp42 protein, the antibody reactivity to peptide  
288 ([VI]XLPHW) was significantly higher among the PVS participants irrespective of the  
289 SARS-CoV-2 infection status (Mann Whitney U test,  $p = <0.01$ ; Figure 4F) and across  
290 the four subgroups (Kruskal-Wallis test,  $p = 0.02$ ; Figure 4G). Greater reactivities were  
291 also observed for the gp350 peptide (KXR[X]RQ]W[XF) among the PVS participants  
292 compared to controls (Kruskal-Wallis test,  $p = 0.04$ ; fig 4J) and across the four  
293 subgroups (Kruskal-Wallis test,  $p = 0.03$ ; Figure S3C). Further, anti-gp42 ([VI]XLPHW)  
294 reactivity by SERA significantly correlated with anti-gp42 ELISA measurements thus  
295 validating the finding ( $R = 0.37$ ,  $p = <0.01$ ; Figure 4I). We also mapped this motif onto  
296 available structures of gp42 complexed with EBV gH/gL (PDB: 5T1D), demonstrating its  
297 location close to the transmembrane (TM) domain of gp42 and surface-exposed (Figure  
298 4H). Study participants with greater antibody reactivity to gp42 as assessed by ELISA  
299 also exhibited higher percentages of TNF $\alpha$ -producing CD8<sup>+</sup> T-cells ( $R = 0.47$ ,  $p = <0.01$ ,  
300 Figure 4K). This correlation was not observed for IL-4, IL-6 double-positive CD4 T cells  
301 (Figure S3D) as was previously reported for long COVID<sup>22</sup>.

## 302 **Participants with PVS have a distinct set of autoantibodies**

303 To evaluate differences in immunoglobulin isotypes and IgG subtypes in the plasma,  
304 Luminex assays were performed. No significant differences were observed between the  
305 PVS cohort and the controls (Figure S4A). Next, to determine the presence of  
306 autoantibodies in PVS, we screened for reactivities across a range of 120 known  
307 autoantigens using microarrays for three different immunoglobulin isotypes, IgM, IgG,  
308 and IgA. We observed significant increases in IgM reactivities against 65 antigens, IgG  
309 reactivity against 1 antigen and IgA reactivities against 39 antigens in PVS compared to  
310 controls after multiple testing corrections (Table S4). Among these antigens, two  
311 showed log<sub>2</sub>fold change of greater than 2: anti-nucleosome IgM (Mann-Whitney U test,  
312  $p = <0.01$ ) and anti-AQP4 IgA ( $p = <0.01$ ) (Figure S4B). Conversely, control participants  
313 exhibited higher reactivities against a total of 21 antigens, 18 of which were of the IgG  
314 isotype and five were of IgA isotype with two common antigens between the two  
315 isotypes (Table S3). Among these autoantibodies, anti-histone H1 IgG differed by

316 greater than log<sub>2</sub>fold change ( $p = <0.01$ , Figure S4B). Infection-positive subgroups had a  
317 higher number of reactivity differences between cases and controls (Figure S4C).  
318 Among the PVS-I participants, anti-calprotectin/S100 IgM, anti-genomic DNA IgA and  
319 anti-ssDNA IgA reactivities were significantly higher while anti-histone H3 IgG, anti-MBP  
320 IgA, and anti-PR3 IgA reactivities were higher among the controls-I (Figure S4C, Table  
321 S5).

### 322 **Circulating hormones and immune modulators in PVS**

323 Two group analyses of circulating hormones and immune modulators revealed  
324 significantly lower levels of fetuin A26 and neurotensin (Mann-Whitney U tests,  $p = 0.01$   
325 and  $p = 0.03$ ; Figure S5A) in participants with PVS with fold differences of 1.3 and 1.9  
326 respectively. Additionally, four group analysis was performed to evaluate the impact of  
327 infection on PVS. Given the smaller number of samples in the four group analyses,  
328 each panel of analytes was independently evaluated. Significantly lower levels of  
329 circulating fetuin A36, and neurotensin were also observed among participants with  
330 PVS with a history of SARS-CoV-2 infection compared to convalescent participants ( $p =$   
331  $0.01$  for both analytes; Figures S5B-C). No differences were observed for other factors  
332 across the subgroups except for  $\beta$  endorphin which was significantly lower in PVS+I  
333 compared to the control+I group ( $p = 0.01$ ; Table S7) without any significant differences  
334 in the two group analyses. No differences were observed in the uninfected subgroups.

### 335 **Increase in circulating SARS-CoV-2 Spike protein in participants with PVS**

336 It has been reported that the BNT162b2 or mRNA-1273 derived S proteins circulate in  
337 the plasma of those vaccinated as early as one day after the vaccine and interactions of  
338 the circulating protein<sup>16</sup>. Hence, we next sought to investigate whether the S1 subunit of  
339 the SARS-CoV-2 S protein could be detected in the plasma. For this, we used an anti-  
340 S1 Successive Proximity Extension Amplification Reaction (SPEAR) immunoassay.  
341 This method can detect S1 levels as low as 5.64 fM. We conducted a one-sided  
342 Kolmogorov–Smirnov test with 1000 permutations to see if the participants with PVS  
343 had higher circulating S1. The results indicated that participants with PVS had  
344 significantly higher circulating S1 levels compared with the control group ( $p = 0.01$ ).  
345 However, circulating S1 was found in only a subset of participants with PVS at varying  
346 concentrations while the control group mostly exhibited a bimodal distribution of zero  
347 and non-zero values (Fig. 5A, Table S2). Detectable S1 was found in participants'  
348 plasma ranging from 26 to 709 days from the most recent known exposure (Figure 5B).  
349 To fully account for the width of this dataset, we included all non-detectable values in  
350 the analysis and applied a generalized regression model accounting for zero-inflation.  
351 We found that both PVS-I and PVS+I groups displayed significantly elevated S1 levels  
352 than the Control-I group ( $p = <0.01$  and  $p = 0.02$ , respectively) (Figure 5C).

353 Given the similarities between PVS and long COVID symptoms, one hypothesis in the  
354 literature is that shared exposure to the S protein may play a role and several groups  
355 have independently reported the presence of circulating S1 & full-length S in long  
356 COVID using various detection methods<sup>16,29</sup>. To further investigate this circulating S1  
357 positivity percentages and levels in the LISTEN cohort subgroups were compared with

358 an external cohort of healthy, convalescent controls and LC participants (MY-LC  
359 cohort). This external cohort, collected from Mount Sinai clinics, included 134  
360 healthy/convalescent controls and 134 long COVID participants, which were all assayed  
361 together with the LISTEN cohort biospecimens.

362 Among the MY-LC healthy [HC(n= 62); no reported SARS-CoV-2 infection],  
363 convalescent controls [CVC(n=72); with reported SARS-CoV-2 infection], and long  
364 COVID participants, detectable S1 was observed in 30.6% of control participants  
365 (41/134; HC= 12.9%; CVC= 22.2%) and 33.6% (45/134) of individuals with long COVID,  
366 with mean S1- $\ln(x_{fM} + 1)$  values of 3.72 and 3.85 respectively among those above the  
367 LLoD. These figures were comparable to the percentages observed among the LISTEN  
368 controls (31.8%) and PVS (35.7%) groups. S1 levels were moderately elevated in the  
369 MY-LC control group compared to the PVS control group ( $p=0.06$ ), potentially reflecting  
370 differences in exposure timing or SARS-CoV-2 variant of concern (VOC). Despite this,  
371 the PVS group demonstrated significantly higher S1 levels compared to both control  
372 cohorts (LISTEN-control:  $p<0.01$ ; MY-LC control:  $p=0.03$ ; mean S1- $\ln(x_{fM} + 1) = 6.24$ )  
373 (Fig. 5D, Table S8).

374  
375 To further validate the findings and to investigate whether the presence of S1 reflects  
376 the presence of full-length S protein among the LISTEN participants, we next conducted  
377 a full-length S SPEAR assay. The calculated values for the LLoD and the LLoQ were  
378 1.81 and 8.24 fM, respectively. The full-length S SPEAR assays showed a significant  
379 correlation between S and S1 across all samples (Fig. 5E), as well as for values above  
380 the LLoD and LLoQ (Fig. 5F, Table S2). Thus, based on SPEAR assays, the individuals  
381 with PVS exhibited elevated levels of circulating full-length S compared to healthy  
382 controls.

### 383 **Immune signatures in PVS subgroups based on the presence of circulating S1** 384 **protein**

385 To gain a clearer understanding of the variability of circulating S1 protein levels, we first  
386 compiled a structured timeline that summarizes the self-reported infection dates,  
387 vaccine numbers (including types and administration dates), and the number of days  
388 between the latest known exposure and the collection of biospecimens. This timeline  
389 was organized for both the PVS-I and PVS+I groups (Figure 5G). Notably, we observed  
390 that the highest levels of detectable S1 in the PVS-I group were the furthest away from  
391 the last known exposure and ranging between greater than 600-700 days (NI-1 & NI-5;  
392 Figure 5G). This suggested that prolonged antigen persistence might be associated with  
393 PVS in a subgroup of patients. Further, most of the PVS+I group participants  
394 experienced breakthrough SARS-CoV-2 infections with the exception of two cases,  
395 indicating that PVS symptoms started prior to infection (Figure. 5G).

396 Given the possible heterogeneity in immunological trajectories leading up to PVS and  
397 the lack of adequate sample numbers in each PVS subgroup, we next took a more  
398 descriptive approach to look for peripheral immune signatures stratified based on their  
399 infection status and detectable S1 above SPEAR assay's lower limit of quantitation. In  
400 order to begin with a valid method of selection despite the small sample sizes, non-

401 parametric Mann-Whitney tests were implemented without multiple testing corrections to  
402 look for differences in distributions of 547 independent variables including GHVAS  
403 scores, circulating modulator levels, anti-SARS-CoV-2 antibody titers and autoantibody  
404 scores within both the PVS-I and PVS+I subgroups. Variables showing significant  
405 differences were further filtered based on greater than 1.5 fold changes to identify the  
406 distinct determinants associated with each of the four trajectories.

407 Among other factors, the infection-naïve PVS participants with quantifiable S1 had lower  
408 GHVAS scores indicative of poorer general health (GHVAS) and lower anti-S IgG titers,  
409 whereas higher circulating IL-7 and IL-21 levels were detected compared to other  
410 groups (Figure. 5H). Elevated growth hormone levels alongside low TSH levels were  
411 also observed among the PVS-I participants with S1 protein in circulation. By contrast,  
412 among the infection-positive subgroups, participants with circulating S1 were observed  
413 to have higher anti-N antibody titers based on the clinical COBAS assays and in-house  
414 ELISA indicative of the contribution of infection history. Moreover, anti-nucleosome IgA  
415 levels were higher among those in the PVS+I subgroup without detectable S1 (Figure.  
416 5H).

#### 417 **Machine Learning-based identification of peripheral immune signatures of PVS**

418 To establish a combined global immune signature for persistent symptoms following  
419 COVID-19 vaccination, we built machine learning models to predict PVS outcomes. The  
420 goal was to identify prominent features that could effectively distinguish PVS from the  
421 controls in a parsimonious manner. Given that autoantibodies are also common in the  
422 general population at low levels, we chose to exclude them from this analysis in the  
423 absence of further validation<sup>30</sup>. Additionally, we excluded any variables with greater than  
424 20% missing values for either the PVS or control groups and SERA variables because  
425 most of the dataset lacked a significant number of values above LLoD. A total of 193  
426 variables were included.

427 Weighted Gene Co-Expression Network Analysis (WCGNA)<sup>31</sup> was applied to this set to  
428 find groups of highly correlated variables (Figure S6B). The final feature set was then  
429 created by taking all variables that did not form a tight cluster (141, Module 1) and the  
430 eigengene, or first principal component, of every other set of variables (Modules 2-6).  
431 This gave us a total of 146 features. Next, we performed classification utilizing Least  
432 Absolute Shrinkage and Selection Operator (LASSO) with nested cross-validation. We  
433 achieved an overall model accuracy of 78.1% on the validation folds (per-fold range  
434 62.5% - 100%; Figure S6A), and an AUC of 0.80 (per-fold range 0.67-1.00, 95% CI =  
435 0.67-0.92; Figures 6A and S6A). A permutation test further concluded that this  
436 performance was significantly above random ( $p = 0.02$ ; Figure S6A). Segregating test  
437 data per-fold by infection status yielded accuracy on the infected population of 86.5%  
438 and the uninfected population of 73.3%. (Figure S6A) Per-class accuracy showed some  
439 divergence, with PVS accuracy of 85.7% vs. control accuracy of 63.6%. This was due to  
440 a subset of the controls clustering primarily with PVS samples, making control  
441 classification more difficult (Figure 6B).



442 The LASSO model selected 21 features using all data, consisting of CD4 T cell  
443 populations, immune modulators, neuropeptides, and antibodies (Figure 6C). Among  
444 the features selected, there were several negatively associated with PVS. These  
445 included circulating factors sIL-1R1, fetuin A36, granzyme A and B, FLT-3L and  
446 HMGB1, and subsets of circulating CD4 T cell populations (CXCR3<sup>+</sup> CD4 T cells CD4<sup>+</sup>  
447 T<sub>EMRA</sub> cells, and IL-4<sup>+</sup>/IL-6<sup>+</sup> CD4 T cells). Multiple hormones and neuropeptides  
448 synthesized by the hypothalamus, pituitary glands, and the peripheral nerves and  
449 involved in nociception and stress responses such as oxytocin, neurotensin,  $\beta$   
450 endorphin, melanocyte-stimulating hormones (MSH), and substance P were also  
451 negatively associated with PVS and formed a single module (Module 6) (Figure 6D).  
452 The features that were positively associated with PVS were anti-EBV gp42 IgG titers,  
453 MMP1 levels, and TNF $\alpha$ <sup>+</sup> CD8 T cells. We observed that no single variable or small  
454 subset of variables had a particularly strong differentiating power.

## 455 DISCUSSION

456 In this study, we examined symptoms and circulating immune factors and cell types  
457 associated with chronic illness following COVID-19 vaccination. Post-acute conditions  
458 following COVID-19 vaccination have been reported for multiple vaccine platforms  
459 including mRNA and adenoviral-vectored vaccines<sup>6,7,8,9</sup>. We observed that the general  
460 health status of the PVS participants was far below the general US population average<sup>32</sup>  
461 based on the GHVAS scores. The patient-reported outcome scores from the  
462 PROMIS29 domains were also indicative of lower quality of life. A large fraction of  
463 individuals reported the onset of symptoms to be as early as within one day of COVID-  
464 19 vaccination. Compared with controls, participants with PVS had reduced CD4<sup>+</sup> T cell  
465 subsets in circulation (both Th1 and Th2) and an increased percentage of TNF $\alpha$ <sup>+</sup> CD8 T  
466 cells. Among cell populations of myeloid origin, cDC2 cells were reduced, and non-  
467 classical monocytes were elevated among PVS participants. Lower S-specific IgG  
468 levels were observed in PVS mainly due to the limited vaccine doses received.  
469 Additionally, serological evidence for recent EBV reactivation was also observed. Using  
470 machine learning approaches, we further identified a set of 21 core predictive features  
471 of PVS status within the LISTEN PVS cohort with potential for further validation and  
472 biomarker identification. Most notably, we found elevated levels of spike (S1 and full-  
473 length S) in circulation up to 709 days after vaccination among a subset with PVS, even  
474 in those with no evidence of detectable SARS-CoV-2 infection.

475 To date, only a few studies have investigated the immunological mechanisms  
476 associated with PVS<sup>11,12,33</sup>, and no consensus definition of this syndrome exists<sup>10,34</sup>.  
477 Previous studies on PVS have found the presence of elevated levels of inflammatory  
478 cytokines such as CCL5, IL-6, and IL-8; IgG subclass imbalances, high angiotensin II  
479 type 1 receptor antibodies (AT1R), and the presence of spike S1 in non-classical  
480 monocytes, among others<sup>11,12,33</sup>. In the LISTEN PVS cohort, we did not find evidence of  
481 elevation in inflammatory cytokines or IgG subclass imbalances. This difference may be  
482 due to the heterogeneity of the cohorts studied, vaccine types or the time from  
483 vaccination.



484 The demographics at risk of developing PVS and symptom manifestations are similar to  
485 those of long COVID<sup>10, 35,36,37</sup>. Whether this reflects overlapping underlying  
486 mechanisms such as persistent S protein remains to be determined. Circulating S1  
487 antigen has been detected in mRNA-1273 vaccine recipients without a prior history of  
488 viral infection within an average of five days after the first injection and becomes  
489 undetectable by day 14<sup>16</sup>. By contrast, in our study, significantly elevated levels of  
490 circulating S1 and S were observed in a subset of PVS participants both in the infection-  
491 naive and infection-positive groups up to 709 days post-exposure. This is in line with the  
492 findings of S1 persistence in monocytes in people with PVS<sup>12</sup>. Circulating full-length S  
493 has also been detected in cases of post-vaccination myocarditis<sup>38</sup>. Given the striking  
494 similarities between long COVID and PVS symptoms, there has been speculation  
495 regarding the potential causal role of the persistent presence of spike protein<sup>39</sup> driving  
496 the chronic symptoms. Additionally, a recent study has shown spike protein binding to  
497 fibrin resulting in inflammation *ex vivo* and neuropathy in animal experiments<sup>40</sup>. S1  
498 subunit is sufficient to cause formation of trypsin-resistant fibrin clots when added to  
499 plasma from healthy individuals<sup>41</sup>. The persistent presence of S1 and the full-length  
500 spike protein across multiple long COVID cohorts lends further support to this  
501 hypothesis<sup>42,43,44,45</sup>. Additionally, our results using the S1 SPEAR assays indicate higher  
502 percentages of individuals with S1 antigen persistence among both MY-LC controls and  
503 the long COVID group compared to other studies despite reporting mild acute phase  
504 symptoms reported by these participants<sup>44,45,43</sup>. This may be attributed to variations in  
505 assay sensitivity or variations in vaccine doses and re-infection rates across the  
506 cohorts. Despite higher antigen persistence rates, the PVS participants with detectable  
507 S1 had higher mean circulating S1 levels compared to the LC participants. In our PVS-I  
508 group, anti-S antibody levels were lower in those with circulating S1. Why persistent  
509 spike antigen fails to elicit an antibody response, and what the source of persistent  
510 spike in circulation is, requires further investigation.

511 Immunophenotyping of circulating PBMCs from participants with PVS revealed lower  
512 levels of circulating CD4<sup>+</sup> Tem, CXCR3 expressing CD4, as well as IL-4<sup>+</sup>/IL-6<sup>+</sup> double  
513 positive CD4 T cell populations and higher TNF $\alpha$  secreting CD8 cell populations. This is  
514 in contrast to our observations of higher levels of IL-4<sup>+</sup>/IL-6<sup>+</sup> CD4 T cell populations in  
515 the long COVID cohort<sup>22</sup>. Elevated levels of anti-S IgG have been observed in long  
516 COVID patients, possibly reflecting persistent S protein<sup>22,42</sup>. By contrast, within the PVS-  
517 I subgroup, the lower levels of anti-S antibodies were associated with a reduced number  
518 of vaccinations. Moreover, PVS participants in this study did not exhibit decreased  
519 circulating cortisol levels or increased fetuin A36 levels, as reported for long COVID<sup>22,46</sup>.

520 While our panel of autoantigens did not include any G protein-coupled receptors  
521 included in the Semmler et al study<sup>11</sup>, among those identified to be elevated in PVS in  
522 this study, namely, anti-nucleosome IgM and anti-AQP4 IgA require further  
523 investigation. Higher monomeric IgM has been reported in autoimmune disease  
524 patients and circulating nucleosomes have also been shown to trigger cGAS (cGMP-  
525 AMP synthase) immune responses<sup>47,48</sup>. Along similar lines, anti-AQP4 IgG is most  
526 commonly associated with neuromyelitis optica spectrum disorder (NMOSD), however  
527 there are not any reports on IgA isotype<sup>49</sup>. In addition, similar to what has been reported

528 in long COVID, elevated antibody responses against EBV lytic antigen were detected  
529 among seropositive participants with PVS, suggesting recent reactivation,<sup>22,28</sup>.

530 This study has several limitations. Our small sample size could have affected the  
531 robustness of the machine learning approaches and prediction of specific immune  
532 features in PVS. Due to the limited sample size, we might have failed to capture small  
533 but potentially important immune features associated with PVS. Analysis of autoimmune  
534 antibody reactivity was restricted to antigens reported in other autoimmune diseases,  
535 limiting the discovery of a broader range of autoantibodies. While we used two  
536 independent approaches to ascertain previous infection with SARS-CoV-2, negative  
537 results cannot definitively preclude prior infection that occurred in the distant past. Other  
538 limitations include the lack of analysis of the host genetics that might account for PVS  
539 susceptibility, or any other conditions, such as non-prescription drugs or asymptomatic  
540 infection with other pathogens that were not tested in our analysis might have  
541 predisposed an individual to develop chronic illness following COVID-19 vaccination.  
542 While we observed elevated levels of S1 among those with PVS compared to LC,  
543 additional studies with matched patient demographic profiles are necessary to  
544 determine whether this represents genuine differences or is simply a result of random  
545 variation. Finally, we do not know whether our findings extend beyond COVID-19  
546 vaccination since we did not include PVS following other vaccines.

547 In summary, by revealing distinct immunological features of PVS, this study helped  
548 generate hypotheses regarding the underlying pathobiology of this condition.  
549 Understanding such mechanisms will help improve the overall safety profile of COVID-  
550 19 vaccines and support public health strategies that maximize vaccine efficacy while  
551 minimizing adverse effects. However, this study is early-stage and requires replication  
552 and validation. We emphasize the critical task of discerning between meaningful results  
553 and random fluctuations in the data. Future work is essential to elucidate these  
554 relationships. As the global community continues to navigate the challenges of COVID-  
555 19 and long COVID, a deeper understanding of vaccine-related immune responses will  
556 be essential in refining vaccination practices and ensuring their long-term success.

## 557 **RESOURCE AVAILABILITY**

558 The flow data repository ID is FR-FCM-Z8FZ for all the raw .fcs files generated for flow  
559 cytometry analyses at the Flow Repository platform<sup>50</sup>. Custom codes used for  
560 computational analyses will be made available by authors upon reasonable request.

## 561 **ACKNOWLEDGEMENTS**

562 We thank all the participants from the LISTEN study who contributed their time, effort  
563 and precious biospecimens for this study. We thank the Yale Center for Clinical  
564 Investigation (YCCI) coordinators Geisa Wilkins, Iris Dias and Yvette Strong for their  
565 support. Victoria Bastos' fellowship was supported by CAPES Foundation, Ministry of  
566 Education, Brazil. This study was funded in part by the Howard Hughes Medical  
567 Institute Collaborative COVID-19 Initiative.

## 568 **AUTHOR CONTRIBUTIONS**

569 Experimental conceptualization, methodology and data visualization were performed by  
570 B.B, P.L.,V.B., V.S.M., A.T., K.W. W.B.H, K.G., K.K. and J.R. Formal analysis was  
571 conducted by B.B, P.L.,V.B., V.S.M., A.T., K.W. W.B.H and K.G. Resources were  
572 provided by H.M.K and A.I. Review of survey responses and electronic health records  
573 were performed by B.B. Sample collection, processing and biospecimen validation were  
574 performed by B.B., T.J.T, P.B. and C.G., The original draft was written by B.B. and A.I.  
575 Review and editing were performed by B.B., P.L.,V.B., V.S.M., A.T., K.W. W.B.H, K.G.,  
576 K.K., J.R., D.H., B.D., L.G, H.M.K, and A.I. Data curation was performed by B.B.,  
577 W.B.H, F.W. L.G. M.S., and H.M.K. and A.I. supervised the study. Funding was  
578 acquired by A.I.

## 579 **DECLARATION OF INTERESTS**

580 In the past three years, H.M.K. received expenses and/or personal fees from United  
581 Health, Element Science, Eyedentifeye and F-Prime; he is a co-founder of Refactor  
582 Health, HugoHealth and MedRxiv; and is associated with contracts, through Yale New  
583 Haven Hospital, from the Centers for Medicare & Medicaid Services and through Yale  
584 University from the Food and Drug Administration, Johnson & Johnson, Google and  
585 Pfizer. A.I. co-founded and consults for RIGImmune, Xanadu Bio and PanV and is a  
586 member of the Board of Directors of Roche Holding and Genentech. B.D. reports being  
587 a plaintiff in a lawsuit against AstraZeneca alleging breach of contract following her  
588 volunteer participation in 2020 in their COVID-19 vaccine clinical trial. She is also a co-  
589 chair of REACT19, a non-profit organization offering financial, physical, and emotional  
590 support for those suffering from long term COVID-19 vaccine adverse events. D.H  
591 serves on the Advisory Board of REACT19.

592

## 593 **SUPPLEMENTAL INFORMATION**

594 Document S1. Figures S1-S6

595 Excel file S2 containing additional data.

596 Table S1: Prevalence of PVS symptoms at the time of recruitment

597 Table S2: Demographic, clinical and immunological data on all participants included in  
598 this study

599 Table S3: Generalized linear modeling analyses results

600 Table S4: Two group autoantibody analysis results

601 Table S5: Four group autoantibody analysis results

602 Table S6: Two group analysis results of soluble modulators

603 Table S7: Four group analysis results of soluble modulators

604 Table S8: External MY-LC cohort SPEAR S1 assay results





622

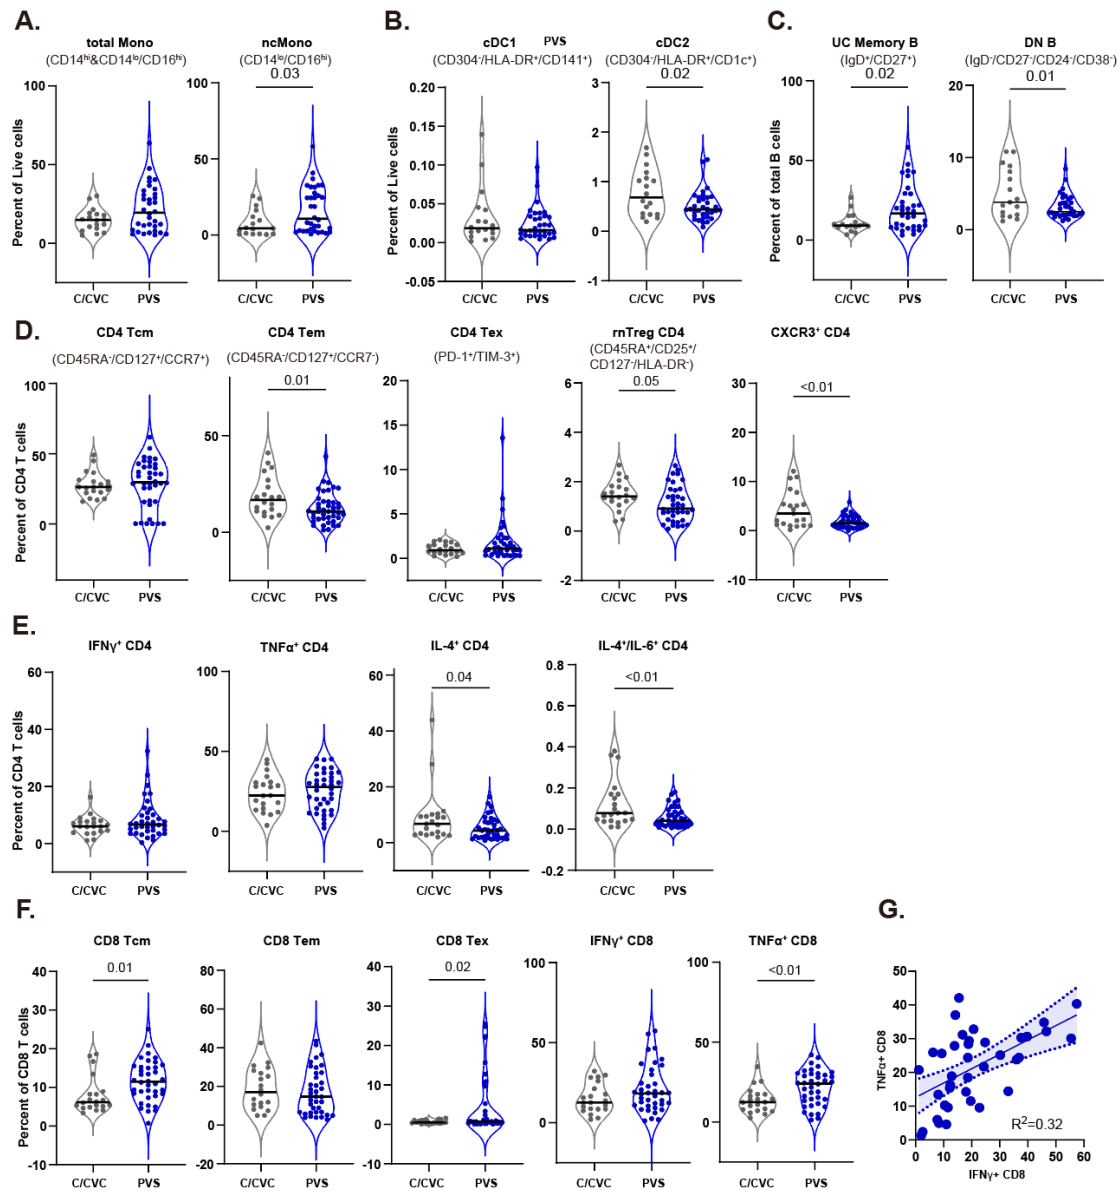

623

624 **Figure 2: Immune cell feature of myeloid and lymphoid cells in PVS patients. A-B.**

625 Violin plots of myeloid peripheral blood mononuclear populations (PBMCs) plotted by

626 groups as percentages of respective parent populations (live cells). **C.** Violin plots of B

627 lymphocyte subsets from PBMCs plotted as percentages of respective parent

628 populations (total B cells). **D.** Violin plots of various CD4 T cell subsets. **E.** Violin plots of

629 various cytokine-producing CD4 T cell subsets. **F.** Violin plots of various CD8 T cell

630 subsets and cytokine-producing CD8 T cell subsets. Significance differences were

631 assessed using Mann-Whitney U tests with Benjamini–Hochberg false-discovery rate

632 (FDR) correction for multiple comparisons. **G.** Linear regressions of TNFα producing

633 CD8 T cells and IFNγ producing CD8 T cells. Spearman's correlation was calculated

634 with corresponding p-values. Dotted lines depict linear regressions, with the area inside

635 representing 95% CI.

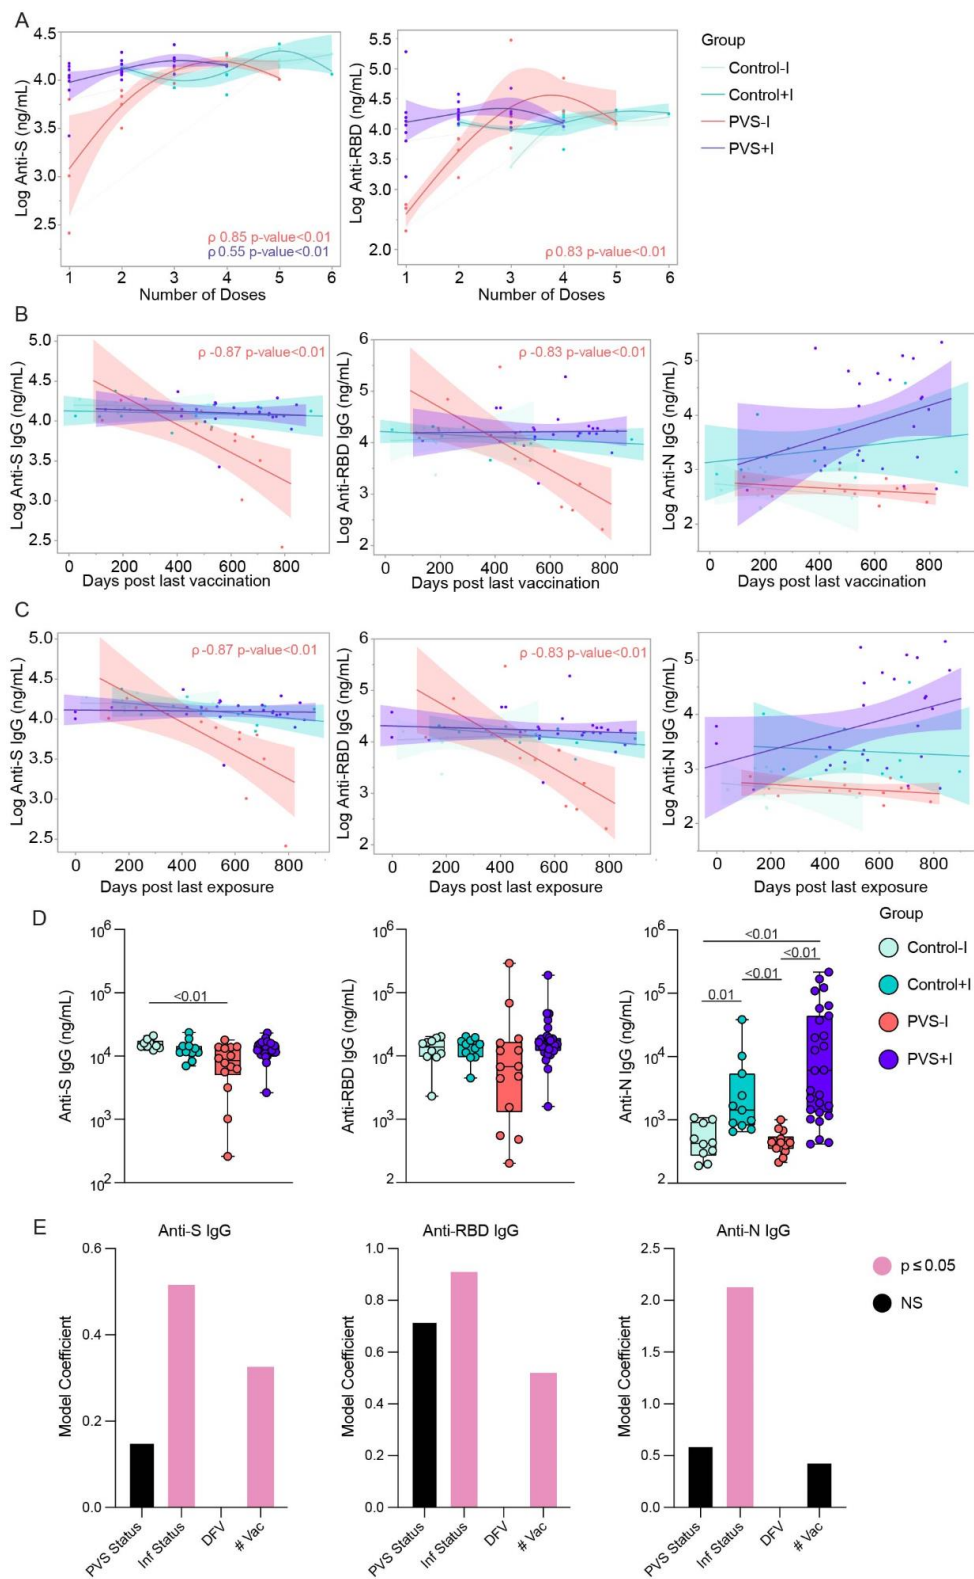

637 **Figure 3: Plasma reactivity to SARS-CoV-2 antigens. A.** Correlation comparisons of  
638 virus-specific ancestral anti-S and anti-RBD IgG levels by number of COVID vaccine  
639 doses. **B.** Correlation and linear regression comparisons of virus-specific ancestral anti-  
640 S, anti-RBD and Anti-N IgG levels by days post last vaccination. **C.** Correlation and  
641 linear regression comparisons of virus-specific ancestral anti-S, anti-RBD and Anti-N  
642 IgG levels by days post last exposure. Regression lines are shown colored by groups  
643 Control-I, Control+I, PVS-I, and PVS+I as indicated in the figure legend. Spearman's  $\rho$   
644 coefficients and linear regression significance are colored; accordingly, shading  
645 represents 95% confidence interval. **D.** Plasma reactivity to ancestral S, RBD, and N  
646 proteins measured by ELISA are shown by groups Control-I, Control+I, PVS-I, and  
647 PVS+I. Significance of difference in group median values was assessed using Kruskal-  
648 Wallis with Benjamini-Hochberg false-discovery rate (FDR) correction for multiple  
649 comparisons. The central lines indicate the group median values, and the whiskers  
650 show the 95% CI estimates. **E.** Generalized linear model analysis for virus-specific  
651 ancestral anti-S, anti-RBD and Anti-N IgG levels. Model predictors are indicated on the  
652 x axis and include days from vaccination (DFV) among others. Predictors with  $p \leq 0.05$   
653 are highlighted in pink to indicate significance, while non-significant predictors are  
654 displayed in black. Detailed model results are shown in table S3.  
655

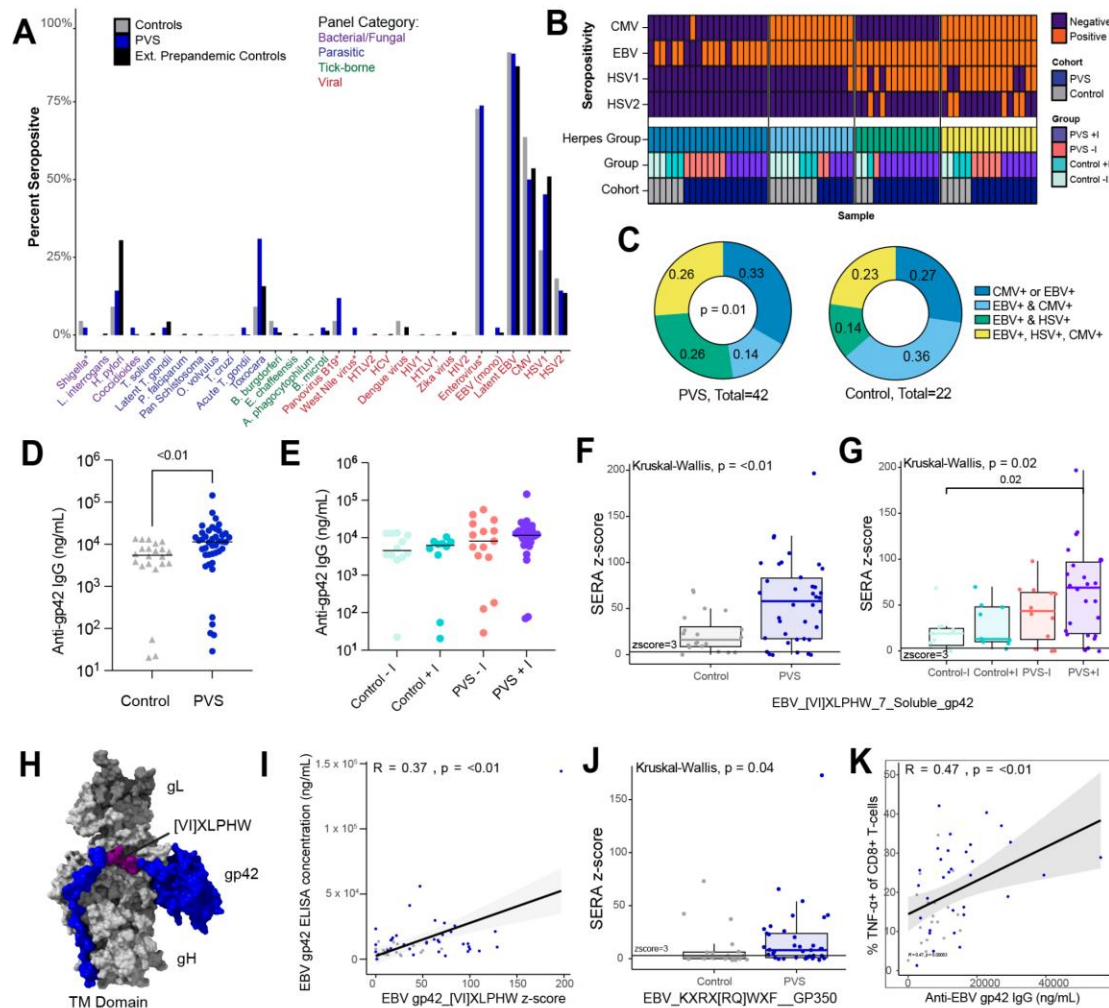

656

657 **Figure 4: Elevated responses to Epstein Barr Virus in PVS patients.** **A.** Proportion  
 658 of each group (PVS:  $n = 42$ , control:  $n = 22$ , pre-pandemic healthy control:  $n = 3448$ )  
 659 seropositive for each of 31 common pathogen panels as determined by SERA, grouped  
 660 by pathogen-type. Statistical significance determined by Fisher's exact test corrected  
 661 with FDR (Benjamini Hochberg). Star indicates panels for which pre-pandemic healthy  
 662 controls were not analyzed. **B.** Heatmap showing supervised clustering of SERA-  
 663 determined seropositivity to EBV, CMV, HSV-1, and HSV-2 across samples. Clusters  
 664 were named for their herpesvirus dominance and are labeled accordingly. **C.** Herpes  
 665 seropositivity composition for each cohort. Significance of relative enrichment for each  
 666 cluster was calculated using Chi-square test of observed composition vs. expected  
 667 composition. **D, E** Plasma reactivity to EBV gp42 protein measured by ELISA shown by  
 668 cohort, PVS and Control (**D**) and by groups Control-I, Control+I, PVS-I, and PVS+I (**E**).  
 669 **F.** SERA-derived z scores for the gp42 motif [VI]XLPHW among EBV-seropositive  
 670 individuals only, plotted by cohort,  $n = 20$  (Control),  $n = 38$  (PVS) (**F**) and group,  $n = 11$   
 671 (Control-I),  $n = 9$  (Control+I),  $n = 12$  (PVS-I),  $n = 26$  (PVS+I) (**G**). The dashed line  
 672 represents the z-score threshold for epitope positivity defined by SERA. **H.** Three-  
 673 dimensional mapping of the PVS-enriched linear peptide sequence [VI]XLPHW (purple)  
 674 onto EBV gp42 (blue) in a complex with gH (light grey) and gL (dark grey) (PDB: 5T1D).

675 **I.** Relationship between EBV gp42 [VI]XLPHW SERA z score and plasma concentration  
676 of anti-gp42 IgG. **J.** SERA-derived z scores for the gp350 motif KXRX[RQ]WXF among  
677 EBV-seropositive individuals only, plotted by cohort. The dashed line represents the z-  
678 score threshold for epitope positivity defined by SERA. **K.** The relationship between  
679 plasma concentration of IgG against EBV gp42 and the percentage of TNF $\alpha$  CD8+ T  
680 cells (of total CD8+ T cells). For all box plots, the central lines indicate the group median  
681 values, the top and bottom lines indicate the 75th and 25th percentiles, respectively, the  
682 whiskers represent 1.5 $\times$  the interquartile range. Each dot represents one individual.  
683 Statistical significance of the difference in median values was determined using  
684 Kruskal–Wallis tests with Post hoc Dunn’s test and Bonferroni–Holm’s method to adjust  
685 for multiple comparisons. Correlation was assessed using Spearman’s correlation. The  
686 black line shows linear regression, and shading shows the 95% CIs.  
687



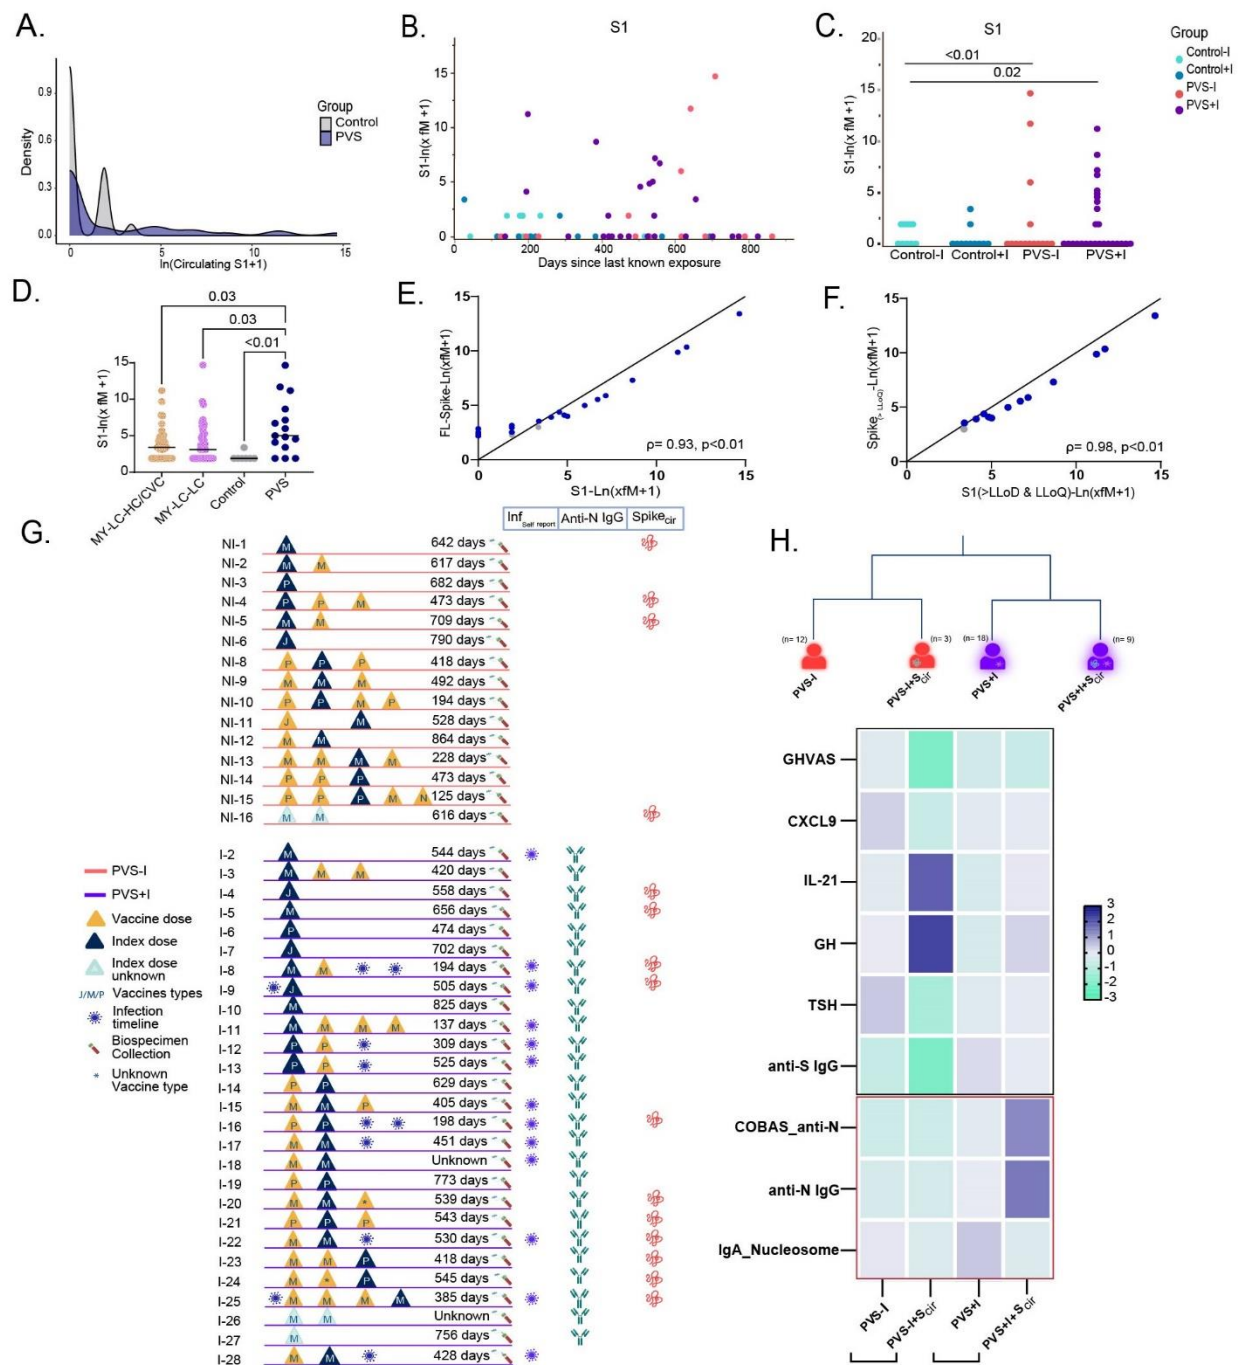

688  
 689 **Figure 5: Circulating SARS-CoV-2 Spike protein.** A. Density plots describing the  
 690 distribution of circulating S1 levels across controls (n= 22) and PVS (n= 42) measured  
 691 by SPEAR assays. B. Levels of circulating S1 in plasma days post last known self-  
 692 reported exposure. C. Circulating S1 levels measured by SPEAR assay are shown  
 693 across groups Control-I, Control+I, PVS-I, and PVS+I. A parametric test incorporating a  
 694 zero-inflated Poisson model was used to account for the excess zeros in the data. D.  
 695 Circulating S1 antigen levels above LLoD across cohort groups, MY-LC-HC/CVC (n=

696 41), MY-LC-LC (n=45), Control (n= 7), PVS (n= 15). **E.** Correlation between circulating  
697 Spike protein assays using antibodies for the S1 subdomains and S1& S2 subdomains  
698 (full length Spike). **F.** Correlation between circulating Spike protein assays among  
699 samples with values above LLoD and LLoQ. Correlations were assessed using  
700 Spearman's rank correlation. **G.** A participant-specific graphic representation illustrating  
701 key events including vaccination, infection, sample collection and the presence or  
702 absence of anti-N antibodies and circulation spike protein. Each participant is  
703 represented by a single horizontal line and each vaccination event is marked by  
704 triangles, and the index doses are highlighted in blue. The number of days between  
705 latest exposure and biospecimen collection is also indicated. The abbreviations for the  
706 vaccine types are: J for Jcovden (Johnson & Johnson), M for Spikevax (Moderna), and  
707 P for Comirnaty (Pfizer-BioNTech). **H.** A classification tree of PVS participants based on  
708 infection status with or without detectable S1 in circulation and a heatmap of distinct  
709 demographic and immunological variables that differentiate PVS within the infected and  
710 uninfected subgroups based on Mann-Whitney U tests.  
711  
712

713

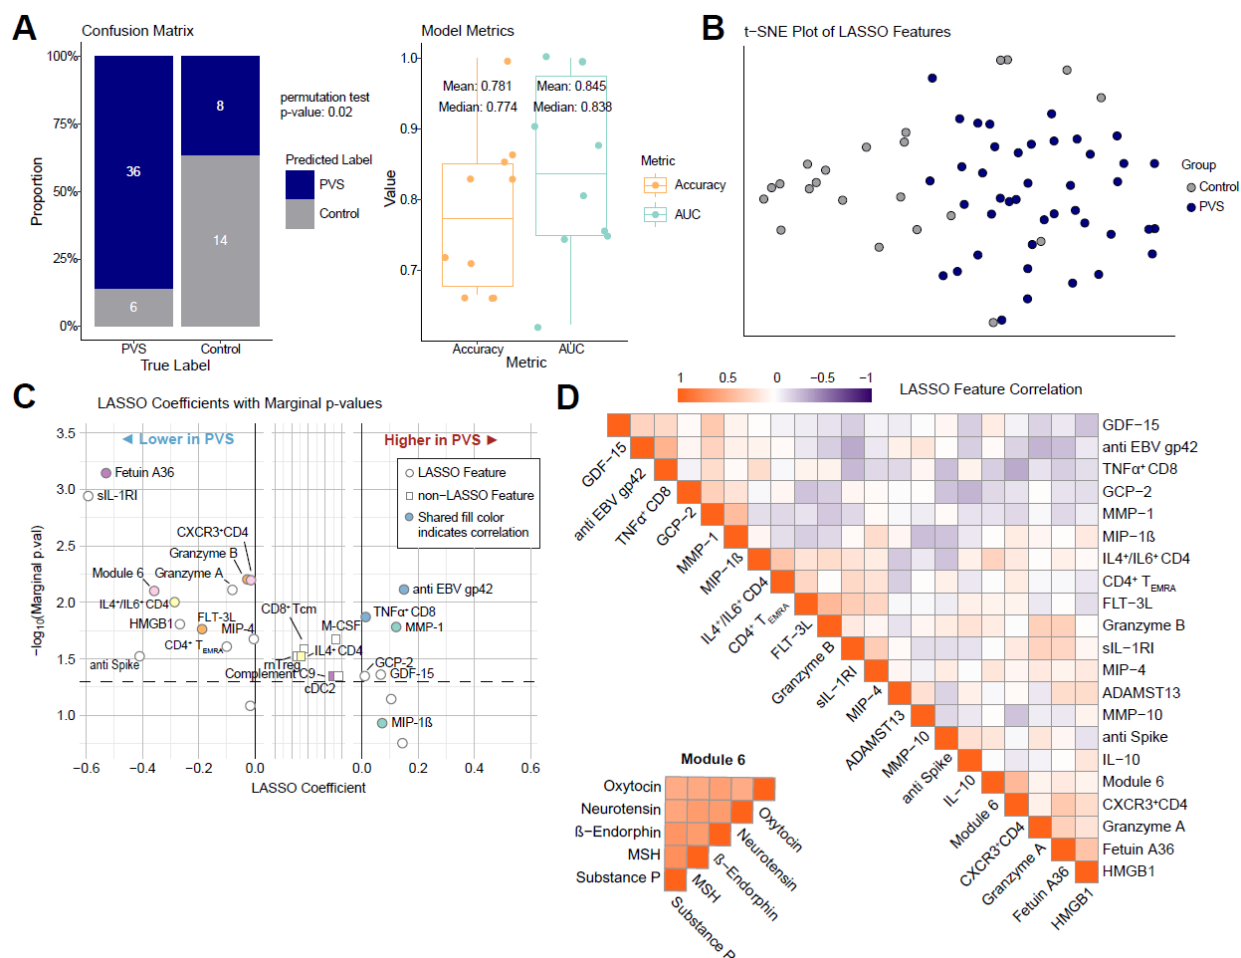

714  
 715 **Figure 6: Machine Learning Results and Prominent Feature Identification. A.**  
 716 Confusion matrix inspired barplot describing actual and predicted labels for PVS and  
 717 control with a classification threshold of 0.65. The p-value from a permutation test is  
 718 also displayed to motivate model legitimacy. Boxplot displaying accuracy and AUC for  
 719 each outer fold of nested-cross validation with both inner and outer loops set to 10.  
 720 Mean and median accuracy and AUC stats are also shown. **B.** t-SNE plot showing a  
 721 two-dimensional similarity-based representation of the LASSO variable space. **C.**  
 722 Scatter plot containing all variables identified through either LASSO or marginal logistic  
 723 regression models. Features only identified by marginal test, and not by LASSO are  
 724 displayed in the center panel with coefficient of 0. Points with a shared color display  
 725 Pearson correlation > 0.4. **D.** Correlation heatmaps of LASSO-selected and WGCNA  
 726 module six features, with features clustered through hierarchical clustering.

727  
 728

## 729 **MATERIALS AND METHODS**

### 730 **Ethics Statement and Study Design**

731 A retrospective, decentralized, exploratory case-control study was conducted on  
732 vaccinated participants  $\geq 18$  years of age enrolled in the LISTEN study which recruited  
733 individuals from the Hugo Health (Guilford, CT, USA) Kindred community<sup>51</sup>. This study  
734 was approved by the Yale University Institutional Review Board on April 1, 2022 (HIC#  
735 2000032207) and conforms to the Declaration of Helsinki and STROBE reporting  
736 guidelines<sup>52,53</sup>. Informed consent was provided by participants electronically. Only those  
737 residing in contiguous US states were included in this arm of the study. Each participant  
738 was assigned a unique identifier as part of the de-identification protocol managed by the  
739 study coordinator. These identifiers were kept confidential and were not accessible to  
740 anyone outside the research team.

741 A subset of the MY-LC cohort recruited from within the Mount Sinai Healthcare System  
742 and the Centre for Post COVID Care at Mount Sinai Hospital which included healthy  
743 and convalescent controls and long COVID participants were included for validation of  
744 one of the assays. The biospecimens were collected between 2021 and 2023 as  
745 approved by the Mount Sinai Program for the Protection of Human Subjects (#20-  
746 01758). The recruitment for the MY-LC cohort has been elaborately described in the  
747 Klein et al study<sup>22</sup>.

### 748 **Inclusion and Exclusion Criteria**

749 Given the exploratory nature of this study, no power analysis was done. Only US  
750 residents were included. Cases were defined as participants who self-reported having  
751 PVS after administration of the primary or booster series of COVID-19 vaccine and  
752 controls were vaccinated individuals who reported no adverse events. The cohort  
753 consisted of both individuals with self-reported history of SARS-CoV-2 infection or  
754 otherwise. Participants with a medical history of arthritis, asthma, autoimmune disease,  
755 blood clots, cancer, cerebrovascular conditions, chronic lung disease (including  
756 emphysema, chronic bronchitis, chronic obstructive pulmonary disease), cystic fibrosis,  
757 diabetes, Ehlers Danlos Syndrome, myocardial infarction, heart conditions, heart failure,  
758 history of organ transplant, immunocompromised state, kidney disease, liver disease,  
759 Lyme disease, mast cell activation syndrome, myalgic encephalomyelitis/chronic fatigue  
760 syndrome, neurologic conditions, postural orthostatic hypotension, spinal disorder(s),  
761 tremors/Internal vibrations, hyperthyroidism, hormonal migraines, schizophrenia  
762 spectrum disorders, bipolar disorders and somatic symptoms before 2020 were  
763 excluded. Participants who self-reported having both long COVID and PVS were also  
764 excluded from this study. Among the selected cases, those with GHVAS scores of  $\leq 75$   
765 at the time of screening were included, while among the controls, only those with  
766 GHVAS scores of  $\geq 80$  or general health of very good/excellent were included.

767 Electronic health records, shared by participants via Hugo Health were accessed to  
768 obtain a participant-wise list of ongoing medications to exclude participants on  
769 immunosuppressants.

## 770 **Survey Instruments**

771 Members of the Hugo Health Kindred community were offered a set of specialized  
772 baseline survey instruments. The first questionnaire was geared towards gathering  
773 information on demographic variables such as age, biological sex, ethnicity as well as  
774 self-reported medical conditions such as long COVID and PVS. The subsequent  
775 surveys were on self-reported SARS-CoV-2 infection, vaccination profiles and medical  
776 history, comorbidities, PVS symptoms<sup>10</sup>. These survey responses were analyzed, and  
777 a subset of the participants were included in this arm of the study based on the inclusion  
778 and exclusion criteria mentioned above.

779 At the time of biospecimen collection, the participants were asked to rate their general  
780 health status using the following options: excellent, very good, good, fair, poor and do  
781 not know and a general health visual analogue scale (GHVAS) having a numerical  
782 value between 0 to 100, where higher scores represented better health. These  
783 responses were recorded by ExamOne phlebotomists on LISTEN-ExamOne requisition  
784 forms and shipped with biospecimens. Participants also completed the Patient-Reported  
785 Outcomes Measurement Information System-29 version 2 questionnaire (PROMIS-29  
786 v2) through the Hugo Health interface within 24 hours of biospecimen collection.

## 787 **Biospecimen collection**

788 Whole blood samples were collected in lithium-heparin-coated vacutainers (BD 367880,  
789 BD Biosciences) from participants' homes or agreed upon locations, by ExamOne  
790 phlebotomists (Quest Diagnostics). Biospecimens were shipped overnight at regulated  
791 temperatures to Yale University in New Haven, CT on the day of collection. Upon  
792 receipt, collection tubes were de-identified according to protocol and study identifiers  
793 were provided. Samples were processed thereafter and within 48 hours of collection.

794 Biorender<sup>54</sup> was used to create a graphical schematic on study design, cohorts and  
795 assays.

## 796 **Plasma and PBMC isolation**

797 Plasma and peripheral blood mononuclear cells (PBMC) were isolated following  
798 protocols published previously<sup>22</sup>. Briefly, whole blood samples were centrifuged at 650g  
799 for 10 minutes at room temperature without brake. Plasma from each participant were  
800 pooled together to a single 15 mL polypropylene conical tube, aliquoted and stored at -  
801 80°C. PBMCs were subsequently isolated using SepMate tubes (StemCell) following  
802 manufacturer's instructions. Freshly isolated PBMCs were used for downstream flow  
803 cytometry analyses or were gradually cryopreserved using a freezing container and  
804 then transferred to liquid nitrogen tanks for long-term storage.

## 805 **Anti-SARS-CoV-2 nucleocapsid (N) antibody testing**

807



808 The EUA-cleared Elecsys Anti-SARS-CoV-2 immunoassay (Roche Diagnostics,  
809 Indianapolis) was used to independently determine prior history of SARS-CoV-2  
810 infection among participants at the Yale-New Haven hospital clinical research  
811 laboratory. Plasma aliquots were analyzed using this double-antigen sandwich (DAGS)  
812 immunoassay that measures total high affinity antibodies directed against the viral N  
813 protein. The COBAS e801 platform (Roche Diagnostics, Switzerland) was used  
814 according to the manufacturer's instructions as validated earlier<sup>25</sup>.

815

816 Both self-reported infection history and the results of this assay were used to determine  
817 a participant's history of SARS-CoV-2 infection. Participants were classified as infection  
818 positive if they reported a past infection but had no detectable anti-N antibodies, or if  
819 they had detectable anti-N antibodies regardless of not reporting a prior infection.

## 820 **Flow cytometry**

821 Flow cytometry was performed on an Attune NxT Flow Cytometer (Thermo Fisher)  
822 using NxT v 5.31.0 software as described previously<sup>22</sup>. In brief, 1 to 2 million freshly  
823 isolated PBMCs were plated in round-bottom 96 well plates for surface and intracellular  
824 staining. Dead cells were stained using Live/Dead Fixable Aqua (ThermoFisher) on ice  
825 followed by a wash and Fc receptor blocking (Human TruStain FcX™, Biolegend). A  
826 total of 30 fluorophore conjugated antibodies were used in three different combinations  
827 for surface staining to define myeloid, B and T cell lineages. Quantitation of intracellular  
828 cytokine staining with stimulation was executed by incubating cells in 1x cell stimulation  
829 cocktail (eBioscience) without protein transport inhibitor for 1 hour in 10% FBS cRPMI  
830 followed by 4 hour incubation in 1x stimulation cocktail with protein transport inhibitor(  
831 eBioscience) in 10% FBS cRPMI at 37°C. Cells were permeabilized using 1x  
832 permeabilization buffer from the FOXP3/Transcription Factor Staining Buffer Set  
833 (eBioscience) at 4 °C and stained after Fc receptor blocking. FlowJo v.10.8 (BD) was  
834 used for data analysis. All the markers and gating strategies were as described  
835 previously and noted in the Flow Repository (ID: FR-FCM-Z8FZ) <sup>22</sup>.

836

## 837 **SARS-CoV-2 antibody specific immunoassays**

838

839 Enzyme-linked immunosorbent assays (ELISA) were run as described earlier <sup>55</sup>. Briefly,  
840 96-well MaxiSorp plates (Thermo Fisher Scientific, #442404) were coated at a  
841 concentration of 2 µg/ml in PBS with recombinant SARS-CoV-2 S protein (50 µl per  
842 well; ACROBiosystems, #SPN-C52H9-100 µg) or RBD (ACROBiosystems, #SPD-  
843 C52H3-100 µg) or nucleocapsid protein (NUN-C5227-100 µg, ACROBiosystems) and  
844 incubated overnight at 4°C. After removing the coating buffer, the plates were blocked  
845 with 200 µl of blocking solution (PBS with 0.1% Tween-20 and 3% milk powder) for 1  
846 hour at room temperature (RT). Plasma samples were diluted 1:1500 (for Anti-Spike  
847 and Anti-RBD) and 1:400 (for Anti-N) in buffer (PBS with 0.1% Tween-20 and 1% milk  
848 powder), and 100 µl of the diluted plasma were added to the wells for 2 hours at RT. A  
849 standard curve was generated using serially diluted Human anti-Spike [SARS-CoV-2  
850 Human Anti-Spike (AM006415) (Biolegend, #938602)] and anti-nucleocapsid SARS-  
851 CoV-2 human anti-nucleocapsid (1A6) (ThermoFisher Scientific, #MA5-35941) . After

852 three washes with PBS-T (PBS with 0.1% Tween-20), 50  $\mu$ l of horseradish peroxidase-  
853 conjugated anti-Human IgG antibody (GenScript #A00166; 1:5000) diluted in buffer was  
854 added to each well and incubated for an hour. The plates were then developed with 100  
855  $\mu$ l of TMB (3,3',5,5'-tetramethylbenzidine) Substrate Reagent Set (BD Biosciences  
856 #555214) and read at wavelengths of 450 and 570 nm.

857

## 858 **Linear peptide profiling & ELISA validation**

859

860 Plasma aliquots were shipped to Serimmune on dry ice and the SERA assays were  
861 used to discover pathogen specific immunoglobulin G responses to linear peptides as  
862 described earlier<sup>22,56</sup>. The published PIWAS method<sup>57</sup> was used to identify candidate  
863 SARS-CoV-2 antigens and epitopes from the UniProt reference proteome  
864 (UP000464024). Briefly, the 12mer peptide sequences captured for each sample were  
865 broken down into 5- and 6-mers (k-mers) and tiled onto the proteome. An enrichment  
866 for each k-mer was then calculated as described<sup>57</sup> based on the frequency of that kmer  
867 in the dataset relative to the frequency expected by random chance. Outliers were  
868 identified by comparing the enrichment to a large pre-pandemic cohort ( $n = 1,500$ ). An  
869 outlier threshold and outlier sum statistic were then derived, and a p value was  
870 calculated by comparing the observed outlier sum statistic to the null distribution. Outlier  
871 sum threshold was set to the 99.5th percentile value of all positions with FDR-adjusted  
872  $p > 0.001$ . All sequence positions that exceeded both thresholds were identified, and  
873 adjacent positions were merged into regions representing candidate epitopes on the  
874 protein.

875

## 876 **ELISA Validation**

877 96-well MaxiSorp plates (Thermo Scientific #442404) were coated with 200 ng per well  
878 of recombinant EBV gp42/ protein (MyBioSource #MBS430545) in PBS and incubated  
879 overnight at 4 °C. Plates were emptied and incubated with 3% Omniblock non-fat dry  
880 milk (American Bioanalytical #AB10109-00100) in PBS with 0.1% Tween 20 (Sigma-  
881 Aldrich, #P7949) for 2 hours at RT and then overnight at 4°C. Plates were washed 3x  
882 with 200  $\mu$ l wash buffer (PBS 0.1% Tween 20). Samples and a serial dilution curve of  
883 monoclonal antibody against EBV gH/gL/gp42 (MyBioSource #MBS430548) were  
884 diluted in 1% Omniblock non-fat dry milk in PBS and added to the plate to incubate for 1  
885 hour at RT. Plates were washed 3x with a wash buffer. Goat anti-human IgG Fc HRP  
886 (Sigma Aldrich, #AP112P) diluted 1:5000 or goat anti-mouse IgG Fc HRP (Southern  
887 Biotech #1030-05) diluted 1:6000 in 1% Omniblock non-fat dry milk in PBS was added  
888 to the plates and incubated for 50 minutes at RT. Plates were washed 5x. Plates were  
889 developed with 50  $\mu$ l of TMB Substrate Reagent Set (BD Biosciences #555214) and the  
890 reaction was stopped after 5 min by the addition of 2 N sulfuric acid. Plates were then  
891 read at a wavelength of 450 nm.

## 892 **Immunoglobulin Isotyping & Autoantigen arrays**

893 Plasma aliquots were shipped to Eve Technologies on dry ice. Two assays were run to  
894 determine the concentrations of the different Ig subtypes and IgG isotypes in the

895 plasma, namely, Immunoglobulin Isotyping 6-Plex Custom Assay (IgG1, IgG2, IgG3,  
896 IgG4, IgA, and IgM) and the Human-IgE-1-Plex-Custom-Assay.

897 Multiplex IgM and IgG autoantibody reactivities were analyzed at the Microarray Core  
898 facility at the University of Texas Southwestern Medical Center, Dallas, TX, USA as  
899 described previously<sup>58,59</sup>. Plasma aliquots were shipped to the facility on dry ice. A  
900 total of 120 human antigens, autoantibodies against which have been associated with  
901 various immune-related diseases or allergic disorders were included, namely, ACE2,  
902 Aggrecan, Albumin,  $\alpha$  Fodrin, Amyloid  $\beta$ (1-40), Amyloid  $\beta$ (1-42), AQP4, BAFF,  
903 BCOADC-E2, BPI, Calprotectin/S100, CD4, CD40, CENP-A, CENP-B, collagen I,  
904 collagen II, collagen III, collagen IV, collagen V, Complement C1q, Complement C3,  
905 Complement C4, Complement C5, Complement C6, Complement C7, Complement C8,  
906 Complement C9, CRP, Cytochrome C, DFS70, dsDNA, EJ, Factor B, Factor H, Factor I,  
907 Factor P, fibrinogen Type I-S, fibronectin, GAD65, GBM, genomic DNA, Gliadin, gp210,  
908 GP2, H/K-ATPase, histone, histone H1, histone H2A, histone H2B, histone H3, HSPG,  
909 IA-2, IF, IFN $\gamma$ , IL-6, IL-12/NKSF, IL-17A, Jo-1, KS, KU (P70/P80), La/SS-B, Laminin,  
910 LC1, LKM 1, LPS, lysozyme, M2, MBP, MDA5, Mi-2, mitochondrion, MPO, myosin,  
911 Nrp1, nucleolin, nucleosome, Nup62, NXP2, OGDC-E2, P0, P1, P2, PCNA, PDC-E2,  
912 PL-7, PL-12, PM/ScI-75, PM/ScI 100, PR3, proteoglycan, prothrombin, Ro/SS-A(52  
913 kDa), Ro/SS-A(60 Kda), SAE1/SAE2, ScI-70, SLA/LP, Sm, Sm/RNP, SmD, SmD1,  
914 SmD2, SmD3, SP100, SRP54, ssDNA, Tau, thyroglobulin, TIF1 $\gamma$ , TLR4, TNF $\alpha$ , TPO,  
915 tTG, U1-snRNP 68/70kDa, U1-snRNP A, U1-snRNP C, U-snRNP B/B', Vimentin,  
916 Vitronectin and  $\beta$ 2-Glycoprotein 1) were printed on 16 pad nitrocellulose Fast Analyte  
917 Scanning Technology (FAST) slides. Eight positive control proteins (human IgM and  
918 IgG, anti-human IgM and IgG) were also imprinted on the arrays as positive controls.  
919 Briefly, DNase I (Thermo Fisher, #AM2222) treated plasma samples were applied onto  
920 the autoantigen arrays at 1:50 dilution. Binding was detected using cy5-labeled anti-  
921 human IgM and cy3-labeled anti-human IgG antibodies (Jackson ImmunoResearch  
922 Laboratories, #IgM 109-606-129, #IgG-109-166-098), and the array slides were  
923 scanned at wavelengths of 532 nm for and 635 nm for cy5 and cy3 respectively using a  
924 Genepix 4400A scanner. Genepix Pro v7.0 software (Molecular Devices) was used to  
925 analyze the image and generate the genepix report (GPR) files. The net signal intensity  
926 (NSI) values for each antigen were calculated by subtracting the negative control  
927 values. Normalized NSI values calculated using built-in positive controls were used for  
928 case-control analyses. Signal-to-noise ratios (SNR) for each antigen were calculated  
929 using the formula: (foreground median value – background median value)/standard  
930 deviation. Antigens with SNR<3 in more than 10% of all samples were excluded. Log<sub>2</sub>  
931 fold-change (FC) values between cases and controls were calculated.

### 932 **Multi-target soluble plasma factor analysis**

933 Plasma aliquots stored at –80 °C were shipped to Eve Technologies on dry ice. All the  
934 samples were run in the same batch to avoid batch effects. The analytes covered by the  
935 following panels were assayed: Human Cytokine/chemokine 96-Plex Discovery Assay  
936 (HD96), Human Cytokine/chemokine Panel 4 12-Plex Discovery Assay(HDIV12),  
937 Human Adipokine 5-Plex Discovery Assay (HDADK5), Human Cardiovascular Disease  
938 Panels 2 and 3 (HDCVD8, HDCVD9), Human Complement Expanded Panel 1 9-Plex

939 Discovery Assay (HDCMPEX1), Human MMP and TIMP 13-Plex Discovery Assay  
940 (HMMP/TIMP-S,P), Human Neuropeptide 5-Plex assay (HNPMAG-35K), Human  
941 Soluble Cytokine Receptor 14-Plex Discovery Assay (HDSCR14), Multi-Species TGF- $\beta$   
942 3-Plex Discovery Assay (TGF $\beta$ 1-3), Human Pituitary Panel 1 7-plex (HPTP1),  
943 Multispecies Hormone Panel 5-Plex (MSHMAG-21K) and Arginase-1.

944 To quantitate the total plasma testosterone levels, competitive ELISAs were performed  
945 as per manufacturer's recommendations with the exception of the dissociation time  
946 which was increased to 30 mins to ensure complete release of protein bound  
947 testosterone (Thermo Fisher, #EIATES). Only analytes with less than 20% missing  
948 values were included in the analyses.

#### 949 **SPEAR SARS-CoV-2 Spike Protein Immunoassay**

950 The SARS-CoV-2 S1 antigen was measured in plasma samples using the SPEAR  
951 SARS-CoV-2 Spike Protein Immunoassay, developed and performed by Spear Bio, Inc.  
952 (Woburn, MA). The SPEAR immunoassay employs two specially designed DNA probes  
953 conjugated to target-specific antibodies that undergo a two-step successive polymerase  
954 extension reaction when bound to the target analyte, producing a unique DNA strand for  
955 analyte quantification with extremely low background. The assay uses antibodies  
956 specific to two distinct epitopes within the S1 subunit (GenScript, #A02052, #A02058).  
957 Plasma samples first underwent a reduction treatment to release S1 from potentially  
958 bound-blocking antibodies. In brief, plasma samples were incubated with SPEAR-  
959 specific reducing reagent for 15 minutes at 37°C, followed by the addition of a SPEAR-  
960 specific reduction quenching solution before incubation with the probes. The treated  
961 samples were then diluted tenfold in the assay diluent and incubated with S1-specific  
962 antibody-oligonucleotide probes for 2 hours at 37°C. This was followed by a 30-minute  
963 reaction to convert the presence of the analyte into DNA signal strands. The DNA signal  
964 strands were quantified through qPCR using the QuantStudio 12K Flex (ThermoFisher)  
965 with primers and qPCR probes specific to the DNA signal strand sequence.

966 Standard curves were generated from a stock solution S1 spike protein spanning from  
967 0.0625 – 100,000 fM. Results from standard curves were used to generate sigmoidal  
968 four parameter logistic (4PL) fits in GraphPad Prism (v 10) software. Sample  
969 concentration results were calculated from run specific 4PL fit, multiplied by dilution  
970 factor. Lower limit of detection (LLoD) was calculated as the concentration  
971 corresponding to 2.5 standard deviation + mean zero in signal (18 replicates per run).  
972 Lower limit of quantification (LLoQ) was derived from the sample precision profile  
973 [measured concentration vs. concentration coefficient of variation (CV)] as the  
974 measured concentration at which a sample precision fit intersects at 20% concentration  
975 CV. The LLoQ and the LLoD values were calculated to be 20.5 fM and 5.64 fM as a  
976 mean of 6 runs. Values below LLoQ were replaced by the assay LLoD value and all  
977 values below LLoD were imputed as zero. The values were then transformed using the  
978 natural logarithm ( $\ln(x + 1)$ ) for comparisons. Analysis between groups was performed  
979 through a generalized regression model for zero inflation distribution (ZI Poisson)  
980 applying Tukey's HSD to each pair.



981 To further validate the S1 assays, independent SPEAR immunoassays were performed  
982 to detect the full-length protein. This assay utilized oligonucleotide probes conjugated to  
983 antibodies targeting both the S1 (GenScript, #A02052) and S2 (R&D Systems, #  
984 MAB11362-100) subdomains. The S1 subunit binding antibody was common to both  
985 the assays.

## 986 **General Statistical Analyses**

987  
988 The association of variables between case and control cohorts and among the four  
989 groups were assessed using Fisher's exact test for categorical variables. For pair-wise  
990 comparisons, Mann-Whitney tests with Benjamini-Hochberg correction for multiple  
991 testing were used. For four-group comparisons, Kruskal-Wallis tests followed by  
992 Conover's post-hoc test with Benjamini-Hochberg method for multiple comparisons  
993 correction were applied to continuous variables. Post hoc tests were also performed  
994 using Dunn's test with Bonferroni-Holm's method to adjust for multiple comparisons.  
995 Both one and two-sided p values  $\leq 0.05$  were considered statistically significant.  
996 Spearman's rank correlation tests were utilized to analyze the relationships between cell  
997 populations, antibody levels, anti-SARS-CoV-2 antibody levels, the number of  
998 vaccinations, days post-vaccination, days post-exposure and in assay validations.  
999

## 1000 **Linear modeling**

1001  
1002 Generalized linear modeling was performed linear regression with outputs of model  
1003 coefficients for each variable and associated p-values  $\leq 0.05$  were considered  
1004 statistically significant. All analysis was performed using R. Standard generalized linear  
1005 model function listed is below.

$$1006 \quad y \sim 1 + \beta_1 X_1 + \beta_2 X_2 + \beta_3 X_3 + \dots$$

## 1008 **Machine Learning Analysis**

1009  
1010 To predict PVS and control outcomes, we utilized a two-step approach involving  
1011 weighted gene co-expression network analysis (WGCNA) and the construction of a  
1012 generalized LASSO linear model<sup>31,60</sup>. Initially, we preprocessed the data via quantile  
1013 normalization to address outliers and skewness, with average ranks assigned in case of  
1014 ties. Due to the presence of highly correlated features, we applied WGCNA to identify  
1015 clusters of features with similar expression patterns. Specifically, we set the soft  
1016 thresholding power parameter to 7, which is crucial for transforming the raw correlations  
1017 into adjacency values, by maintaining the highest mean connectivity and achieving a  
1018 model fit higher than 0.8. Using this selected parameter, we computed the network  
1019 adjacency based on Pearson correlation within a signed network. We then constructed a  
1020 topological overlap matrix (TOM) and converted it into its corresponding dissimilarity  
1021 measure. Hierarchical clustering was performed on this measure with ward.D2 linkage,  
1022 and the dendrogram was pruned to enforce a minimum cluster size of 5. This process  
1023 allowed us to identify 6 distinct modules.

1024  
1025 We built the LASSO model using raw features from module 1, a large module with  
1026 numerous features that was not further clustered, along with the eigengenes (first



1027 principal component) of the other 5 modules. To compensate for small sample size and  
1028 assess model performance, we conducted nested cross-validation with both inner and  
1029 outer loops set to 10, and adjusted the classification threshold to 0.65 to combat class  
1030 imbalance. Additionally, a permutation test was performed by shuffling the PVS label  
1031 within the infection and non-infection group, demonstrating the fitted model performed  
1032 better than random chance. We then refitted the LASSO model using all available data  
1033 and applied the min criterion rule to select important features. Given that LASSO does  
1034 not inherently provide p-values due to its regularization nature, we also assessed the  
1035 marginal significance of each individual feature using logistic regression. To better  
1036 understand model performance, t-SNE, or t-distributed Stochastic Neighbor Embedding,  
1037 was used to create low-dimension plots of the LASSO variable space.

1038  
1039 Lastly, to ensure model robustness, a secondary workflow was utilized to examine  
1040 variable importance. For this, a random forest model was created utilizing nested cross-  
1041 validation and SMOTE up-sampling to compensate for class imbalance. Random forest  
1042 permutation importance was then used as a metric to examine the top features.

1043  
1044  
1045

## 1046 References

- 1047  
1048 1. Watson, O.J., Barnsley, G., Toor, J., Hogan, A.B., Winskill, P., and Ghani, A.C. (2022).  
1049 Global impact of the first year of COVID-19 vaccination: a mathematical modelling study.  
1050 *Lancet Infect Dis* 22, 1293-1302. 10.1016/S1473-3099(22)00320-6.  
1051 2. Zheng, C., Shao, W., Chen, X., Zhang, B., Wang, G., and Zhang, W. (2022). Real-world  
1052 effectiveness of COVID-19 vaccines: a literature review and meta-analysis. *Int J Infect*  
1053 *Dis* 114, 252-260. 10.1016/j.ijid.2021.11.009.  
1054 3. Xie, Y., Choi, T., and Al-Aly, Z. (2024). Postacute Sequelae of SARS-CoV-2 Infection in  
1055 the Pre-Delta, Delta, and Omicron Eras. *N Engl J Med* 391, 515-525.  
1056 10.1056/NEJMoa2403211.  
1057 4. De Domenico, M. (2023). Prevalence of long COVID decreases for increasing COVID-19  
1058 vaccine uptake. *PLOS Glob Public Health* 3, e0001917. 10.1371/journal.pgph.0001917.  
1059 5. (2024). In *Evidence Review of the Adverse Effects of COVID-19 Vaccination and*  
1060 *Intramuscular Vaccine Administration*, D. Rosenberg, O.K. Kumova, K. Stratton, and  
1061 A.R. Bass, eds. 10.17226/27746.  
1062 6. Faksova, K., Walsh, D., Jiang, Y., Griffin, J., Phillips, A., Gentile, A., Kwong, J.C.,  
1063 Macartney, K., Naus, M., Grange, Z., et al. (2024). COVID-19 vaccines and adverse  
1064 events of special interest: A multinational Global Vaccine Data Network (GVDN) cohort  
1065 study of 99 million vaccinated individuals. *Vaccine* 42, 2200-2211.  
1066 10.1016/j.vaccine.2024.01.100.  
1067 7. Schultz, N.H., Sorvoll, I.H., Michelsen, A.E., Munthe, L.A., Lund-Johansen, F., Ahlen,  
1068 M.T., Wiedmann, M., Aamodt, A.H., Skattor, T.H., Tjonnfjord, G.E., and Holme, P.A.  
1069 (2021). Thrombosis and Thrombocytopenia after ChAdOx1 nCoV-19 Vaccination. *N*  
1070 *Engl J Med* 384, 2124-2130. 10.1056/NEJMoa2104882.  
1071 8. Lamprinou, M., Sachinidis, A., Stamoula, E., Vavilis, T., and Papazisis, G. (2023).  
1072 COVID-19 vaccines adverse events: potential molecular mechanisms. *Immunol Res* 71,  
1073 356-372. 10.1007/s12026-023-09357-5.

- 1074 9. Buoninfante, A., Andeweg, A., Genov, G., and Cavaleri, M. (2024). Myocarditis  
1075 associated with COVID-19 vaccination. *NPJ Vaccines* 9, 122. 10.1038/s41541-024-  
1076 00893-1.
- 1077 10. Krumholz, H.M., Wu, Y., Sawano, M., Shah, R., Zhou, T., Arun, A.S., Khosla, P.,  
1078 Kaleem, S., Vashist, A., Bhattacharjee, B., et al. (2023). Post-Vaccination Syndrome: A  
1079 Descriptive Analysis of Reported Symptoms and Patient Experiences After Covid-19  
1080 Immunization. medRxiv. 10.1101/2023.11.09.23298266.
- 1081 11. Semmler, A., Mundorf, A.K., Kuechler, A.S., Schulze-Bosse, K., Heidecke, H., Schulze-  
1082 Forster, K., Schott, M., Uhrberg, M., Weinhold, S., Lackner, K.J., et al. (2023). Chronic  
1083 Fatigue and Dysautonomia following COVID-19 Vaccination Is Distinguished from  
1084 Normal Vaccination Response by Altered Blood Markers. *Vaccines (Basel)* 11.  
1085 10.3390/vaccines11111642.
- 1086 12. Bruce K. Patterson, R.Y., Edgar B. Francisco, Emily Long, Amruta Pise, Eric Osgood,  
1087 John Bream, Mark Kreimer, Devon Jeffers, Christopher Beaty, Richard Vander Heide,  
1088 Jose Guevara-Coto, Rodrigo A Mora-Rodríguez Persistence of S1 Spike Protein in  
1089 CD16+ Monocytes up to 245 Days in SARS-CoV-2 Negative Post COVID-19  
1090 Vaccination Individuals with Post-Acute Sequelae of COVID-19 (PASC)-Like Symptoms.
- 1091 13. Trougakos, I.P., Terpos, E., Alexopoulos, H., Politou, M., Paraskevis, D., Scorilas, A.,  
1092 Kastritis, E., Andreakos, E., and Dimopoulos, M.A. (2022). Adverse effects of COVID-19  
1093 mRNA vaccines: the spike hypothesis. *Trends Mol Med* 28, 542-554.  
1094 10.1016/j.molmed.2022.04.007.
- 1095 14. Verbeke, R., Hogan, M.J., Lore, K., and Pardi, N. (2022). Innate immune mechanisms of  
1096 mRNA vaccines. *Immunity* 55, 1993-2005. 10.1016/j.immuni.2022.10.014.
- 1097 15. Appledorn, D.M., Patial, S., McBride, A., Godbehere, S., Van Rooijen, N.,  
1098 Parameswaran, N., and Amalfitano, A. (2008). Adenovirus vector-induced innate  
1099 inflammatory mediators, MAPK signaling, as well as adaptive immune responses are  
1100 dependent upon both TLR2 and TLR9 in vivo. *J Immunol* 181, 2134-2144.  
1101 10.4049/jimmunol.181.3.2134.
- 1102 16. Ogata, A.F., Cheng, C.A., Desjardins, M., Senussi, Y., Sherman, A.C., Powell, M.,  
1103 Novack, L., Von, S., Li, X., Baden, L.R., and Walt, D.R. (2022). Circulating Severe Acute  
1104 Respiratory Syndrome Coronavirus 2 (SARS-CoV-2) Vaccine Antigen Detected in the  
1105 Plasma of mRNA-1273 Vaccine Recipients. *Clin Infect Dis* 74, 715-718.  
1106 10.1093/cid/ciab465.
- 1107 17. Cognetti, J.S., and Miller, B.L. (2021). Monitoring Serum Spike Protein with Disposable  
1108 Photonic Biosensors Following SARS-CoV-2 Vaccination. *Sensors (Basel)* 21.  
1109 10.3390/s21175857.
- 1110 18. Patterson, B.K., Francisco, E.B., Yogendra, R., Long, E., Pise, A., Rodrigues, H., Hall,  
1111 E., Herrera, M., Parikh, P., Guevara-Coto, J., et al. (2021). Persistence of SARS CoV-2  
1112 S1 Protein in CD16+ Monocytes in Post-Acute Sequelae of COVID-19 (PASC) up to 15  
1113 Months Post-Infection. *Front Immunol* 12, 746021. 10.3389/fimmu.2021.746021.
- 1114 19. Assessment report\_Spikevax. (2023).  
1115 [https://www.ema.europa.eu/en/documents/assessment-report/spikevax-previously-](https://www.ema.europa.eu/en/documents/assessment-report/spikevax-previously-covid-19-vaccine-moderna-epar-public-assessment-report_en.pdf)  
1116 [covid-19-vaccine-moderna-epar-public-assessment-report\\_en.pdf](https://www.ema.europa.eu/en/documents/assessment-report/spikevax-previously-covid-19-vaccine-moderna-epar-public-assessment-report_en.pdf).
- 1117 20. Theoharides, T.C. (2022). Could SARS-CoV-2 Spike Protein Be Responsible for Long-  
1118 COVID Syndrome? *Mol Neurobiol* 59, 1850-1861. 10.1007/s12035-021-02696-0.
- 1119 21. Segal, Y., and Shoenfeld, Y. (2018). Vaccine-induced autoimmunity: the role of  
1120 molecular mimicry and immune crossreaction. *Cell Mol Immunol* 15, 586-594.  
1121 10.1038/cmi.2017.151.
- 1122 22. Klein, J., Wood, J., Jaycox, J.R., Dhodapkar, R.M., Lu, P., Gehlhausen, J.R.,  
1123 Tabachnikova, A., Greene, K., Tabacof, L., Malik, A.A., et al. (2023). Distinguishing

- 1124 features of long COVID identified through immune profiling. *Nature* 623, 139-148.  
1125 10.1038/s41586-023-06651-y.
- 1126 23. The Yale LISTEN Study. <https://medicine.yale.edu/ycci/listen-study/>.
- 1127 24. Ma, Q., Liu, J., Liu, Q., Kang, L., Liu, R., Jing, W., Wu, Y., and Liu, M. (2021). Global  
1128 Percentage of Asymptomatic SARS-CoV-2 Infections Among the Tested Population and  
1129 Individuals With Confirmed COVID-19 Diagnosis: A Systematic Review and Meta-  
1130 analysis. *JAMA Netw Open* 4, e2137257. 10.1001/jamanetworkopen.2021.37257.
- 1131 25. El-Khoury, J.M., Schulz, W.L., and Durant, T.J.S. (2021). Longitudinal Assessment of  
1132 SARS-CoV-2 Antinucleocapsid and Antispikes-1-RBD Antibody Testing Following PCR-  
1133 Detected SARS-CoV-2 Infection. *J Appl Lab Med* 6, 1005-1011. 10.1093/jalm/jfab030.
- 1134 26. Pirofski, L.A., and Casadevall, A. (2020). The state of latency in microbial pathogenesis.  
1135 *J Clin Invest* 130, 4525-4531. 10.1172/JCI136221.
- 1136 27. Hodel, F., Naret, O., Bonnet, C., Brenner, N., Bender, N., Waterboer, T., Marques-Vidal,  
1137 P., Vollenweider, P., and Fellay, J. (2022). The combined impact of persistent infections  
1138 and human genetic variation on C-reactive protein levels. *BMC Med* 20, 416.  
1139 10.1186/s12916-022-02607-7.
- 1140 28. Su, Y., Yuan, D., Chen, D.G., Ng, R.H., Wang, K., Choi, J., Li, S., Hong, S., Zhang, R.,  
1141 Xie, J., et al. (2022). Multiple early factors anticipate post-acute COVID-19 sequelae.  
1142 *Cell* 185, 881-895 e820. 10.1016/j.cell.2022.01.014.
- 1143 29. Rodriguez, L., Tan, Z., Lakshminanth, T., Wang, J., Barcenilla, H., Swank, Z., Zuo, F.,  
1144 Abolhassani, H., Pavlovitch-Bedzyk, A. J., Wang, C., Gonzalez, L., Mugabo, C. H.,  
1145 Johnsson, A., Chen, Y., James, A., Mikes, J., Kleberg, L., Sundling, C., Björnson, M.,  
1146 Nygren Bonnier, M., Ståhlberg, M., Runold, M., Björkander, S., Melén, E., Meyts, I., Van  
1147 Weyenbergh, J., Hammarström, Q.-P., Davis, M. M., Walt, D. R., Landegren, N., COVID  
1148 Human Genetic Effort, Aiuti, A., Casari, G., Casanova, J.-L., Jamouille, M., Bruchfeld, J.,  
1149 Brodin, P. (2024). Restrained memory CD8+ T cell responses favors viral persistence  
1150 and elevated IgG responses in patients with severe Long COVID.
- 1151 30. Didier, K., Bolko, L., Giusti, D., Toquet, S., Robbins, A., Antonicelli, F., and Servettaz, A.  
1152 (2018). Autoantibodies Associated With Connective Tissue Diseases: What Meaning for  
1153 Clinicians? *Front Immunol* 9, 541. 10.3389/fimmu.2018.00541.
- 1154 31. Langfelder, P., and Horvath, S. (2008). WGCNA: an R package for weighted correlation  
1155 network analysis. *BMC Bioinformatics* 9, 559. 10.1186/1471-2105-9-559.
- 1156 32. Jiang, R., Janssen, M.F.B., and Pickard, A.S. (2021). US population norms for the EQ-  
1157 5D-5L and comparison of norms from face-to-face and online samples. *Qual Life Res*  
1158 30, 803-816. 10.1007/s11136-020-02650-y.
- 1159 33. Mundorf, A.K., Semmler, A., Heidecke, H., Schott, M., Steffen, F., Bittner, S., Lackner,  
1160 K.J., Schulze-Bosse, K., Pawlitzki, M., Meuth, S.G., et al. (2024). Clinical and Diagnostic  
1161 Features of Post-Acute COVID-19 Vaccination Syndrome (PACVS). *Vaccines (Basel)*  
1162 12. 10.3390/vaccines12070790.
- 1163 34. Scholkmann, F., and May, C.A. (2023). COVID-19, post-acute COVID-19 syndrome  
1164 (PACS, "long COVID") and post-COVID-19 vaccination syndrome (PCVS, "post-  
1165 COVIDvac-syndrome"): Similarities and differences. *Pathol Res Pract* 246. ARTN  
1166 154497  
1167 10.1016/j.prp.2023.154497.
- 1168 35. Kwan, A.C., Ebinger, J.E., Wei, J., Le, C.N., Oft, J.R., Zabner, R., Teodorescu, D.,  
1169 Botting, P.G., Navarrette, J., Ouyang, D., et al. (2023). Author Correction: Apparent risks  
1170 of postural orthostatic tachycardia syndrome diagnoses after COVID-19 vaccination and  
1171 SARS-Cov-2 Infection. *Nat Cardiovasc Res* 2, 956. 10.1038/s44161-023-00339-2.
- 1172 36. Safavi, F., Gustafson, L., Walitt, B., Lehky, T., Dehbashi, S., Wiebold, A., Mina, Y., Shin,  
1173 S., Pan, B., Polydefkis, M., et al. (2022). Neuropathic symptoms with SARS-CoV-2  
1174 vaccination. *medRxiv*. 10.1101/2022.05.16.22274439.

- 1175 37. Davis, H.E., McCorkell, L., Vogel, J.M., and Topol, E.J. (2023). Long COVID: major  
1176 findings, mechanisms and recommendations. *Nat Rev Microbiol* 21, 133-146.  
1177 10.1038/s41579-022-00846-2.
- 1178 38. Yonker, L.M., Swank, Z., Bartsch, Y.C., Burns, M.D., Kane, A., Boribong, B.P., Davis,  
1179 J.P., Loiselle, M., Novak, T., Senussi, Y., et al. (2023). Circulating Spike Protein  
1180 Detected in Post-COVID-19 mRNA Vaccine Myocarditis. *Circulation* 147, 867-876.  
1181 10.1161/CIRCULATIONAHA.122.061025.
- 1182 39. Proal, A.D., VanElzaker, M.B., Aleman, S., Bach, K., Boribong, B.P., Buggert, M.,  
1183 Cherry, S., Chertow, D.S., Davies, H.E., Dupont, C.L., et al. (2023). SARS-CoV-2  
1184 reservoir in post-acute sequelae of COVID-19 (PASC). *Nat Immunol* 24, 1616-1627.  
1185 10.1038/s41590-023-01601-2.
- 1186 40. Ryu, J.K., Yan, Z., Montano, M., Sozmen, E.G., Dixit, K., Suryawanshi, R.K., Matsui, Y.,  
1187 Helmy, E., Kaushal, P., Makanani, S.K., et al. (2024). Fibrin drives thromboinflammation  
1188 and neuropathology in COVID-19. *Nature* 633, 905-913. 10.1038/s41586-024-07873-4.
- 1189 41. Grobbelaar, L.M., Venter, C., Vlok, M., Ngoepe, M., Laubscher, G.J., Lourens, P.J.,  
1190 Steenkamp, J., Kell, D.B., and Pretorius, E. (2021). SARS-CoV-2 spike protein S1  
1191 induces fibrin(ogen) resistant to fibrinolysis: implications for microclot formation in  
1192 COVID-19. *Biosci Rep* 41. 10.1042/BSR20210611.
- 1193 42. Rodriguez, L., Tan, Z., Lakshmikanth, T., Wang, J., Barcenilla, H., Swank, Z., Zuo, F.,  
1194 Abolhassani, H., Pavlovitch-Bedzyk, A.J., Wang, C., et al. (2024). Restrained memory  
1195 CD8<sup>+</sup> T cell responses favors viral persistence and elevated IgG responses  
1196 in patients with severe Long COVID. medRxiv, 2024.2002.2011.24302636.  
1197 10.1101/2024.02.11.24302636.
- 1198 43. Swank, Z., Senussi, Y., Manickas-Hill, Z., Yu, X.G., Li, J.Z., Alter, G., and Walt, D.R.  
1199 (2023). Persistent Circulating Severe Acute Respiratory Syndrome Coronavirus 2 Spike  
1200 Is Associated With Post-acute Coronavirus Disease 2019 Sequelae. *Clin Infect Dis* 76,  
1201 e487-e490. 10.1093/cid/ciac722.
- 1202 44. Swank, Z., Borberg, E., Chen, Y., Senussi, Y., Chalise, S., Manickas-Hill, Z., Yu, X.G.,  
1203 Li, J.Z., Alter, G., Henrich, T.J., et al. (2024). Measurement of circulating viral antigens  
1204 post-SARS-CoV-2 infection in a multicohort study. *Clin Microbiol Infect* 30, 1599-1605.  
1205 10.1016/j.cmi.2024.09.001.
- 1206 45. Peluso, M.J., Swank, Z.N., Goldberg, S.A., Lu, S., Dalhuisen, T., Borberg, E., Senussi,  
1207 Y., Luna, M.A., Chang Song, C., Clark, A., et al. (2024). Plasma-based antigen  
1208 persistence in the post-acute phase of COVID-19. *Lancet Infect Dis* 24, e345-e347.  
1209 10.1016/S1473-3099(24)00211-1.
- 1210 46. McAlpine, L. (2024). Vascular Inflammation in Neuropsychiatric Long COVID. *Ann*  
1211 *Neurol* 96, S261-S262.
- 1212 47. Duarte-Rey, C., Bogdanos, D.P., Leung, P.S.C., Anaya, J.M., and Gershwin, M.E.  
1213 (2012). IgM predominance in autoimmune disease: Genetics and gender. *Autoimmun*  
1214 *Rev* 11, A404-A412. 10.1016/j.autrev.2011.12.001.
- 1215 48. Wang, H., Zang, C., Ren, M., Shang, M., Wang, Z., Peng, X., Zhang, Q., Wen, X., Xi, Z.,  
1216 and Zhou, C. (2020). Cellular uptake of extracellular nucleosomes induces innate  
1217 immune responses by binding and activating cGMP-AMP synthase (cGAS). *Sci Rep* 10,  
1218 15385. 10.1038/s41598-020-72393-w.
- 1219 49. Uzawa, A., Oertel, F.C., Mori, M., Paul, F., and Kuwabara, S. (2024). NMOSD and  
1220 MOGAD: an evolving disease spectrum. *Nat Rev Neurol* 20, 602-619. 10.1038/s41582-  
1221 024-01014-1.
- 1222 50. Flow Repository-FR-FCM-Z8FZ
- 1223 51. Hugo Health. <https://hugo.health/>.



- 1224 52. World Medical, A. (2013). World Medical Association Declaration of Helsinki: ethical  
1225 principles for medical research involving human subjects. *JAMA* 310, 2191-2194.  
1226 10.1001/jama.2013.281053.
- 1227 53. von Elm, E., Altman, D.G., Egger, M., Pocock, S.J., Gotsche, P.C., Vandenbroucke,  
1228 J.P., and Initiative, S. (2007). The Strengthening the Reporting of Observational Studies  
1229 in Epidemiology (STROBE) statement: guidelines for reporting observational studies.  
1230 *Ann Intern Med* 147, 573-577. 10.7326/0003-4819-147-8-200710160-00010.
- 1231 54. Scientific Image and Illustration Software-Biorender. <https://www.biorender.com/>.
- 1232 55. Filardi, B.A., Monteiro, V.S., Schwartzmann, P.V., do Prado Martins, V., Zucca, L.E.R.,  
1233 Baiocchi, G.C., Malik, A.A., Silva, J., Hahn, A.M., Chen, N.F.G., et al. (2023). Age-  
1234 dependent impairment in antibody responses elicited by a homologous CoronaVac  
1235 booster dose. *Sci Transl Med* 15, eade6023. 10.1126/scitranslmed.ade6023.
- 1236 56. Kamath, K., Reifert, J., Johnston, T., Gable, C., Pantazes, R.J., Rivera, H.N., McAuliffe,  
1237 I., Handali, S., and Daugherty, P.S. (2020). Antibody epitope repertoire analysis enables  
1238 rapid antigen discovery and multiplex serology. *Sci Rep* 10, 5294. 10.1038/s41598-020-  
1239 62256-9.
- 1240 57. Haynes, W.A., Kamath, K., Waitz, R., Daugherty, P.S., and Shon, J.C. (2021). Protein-  
1241 Based Immunome Wide Association Studies (PIWAS) for the Discovery of Significant  
1242 Disease-Associated Antigens. *Front Immunol* 12, 625311. 10.3389/fimmu.2021.625311.
- 1243 58. Mu-Mosley, H., von Itzstein, M.S., Fattah, F., Liu, J., Zhu, C., Xie, Y., Wakeland, E.K.,  
1244 Park, J.Y., Kahl, B.S., Diefenbach, C.S., and Gerber, D.E. (2024). Distinct autoantibody  
1245 profiles across checkpoint inhibitor types and toxicities. *Oncoimmunology* 13, 2351255.  
1246 10.1080/2162402X.2024.2351255.
- 1247 59. Ghosh, N., Postow, M., Zhu, C., Jannat-Khah, D., Li, Q.Z., Vitone, G., Chan, K.K., and  
1248 Bass, A.R. (2022). Lower baseline autoantibody levels are associated with immune-  
1249 related adverse events from immune checkpoint inhibition. *J Immunother Cancer* 10.  
1250 10.1136/jitc-2021-004008.
- 1251 60. Tibshirani, R. (1996). Regression shrinkage and selection via the Lasso. *J Roy Stat Soc*  
1252 B 58, 267-288. DOI 10.1111/j.2517-6161.1996.tb02080.x.
- 1253
